# Supplementary material for: New pyrazolylindolin-2-one based coumarin derivatives as anti-melanoma agents: design, synthesis, dual BRAFV600E/VEGFR-2 inhibition, and computational studies
Source: Royal Society of Chemistry journal article supplement (doi:10.1039/d4ra00157e), 2024-01-01
Supplement: d4ra00157e1.pdf [file d4ra00157e1.pdf]

## Supplementary material

**New pyrazolyindolin-2-one based coumarin derivatives as anti-melanoma agents:  
Design, synthesis, dual BRAF<sup>V600E</sup>/ VEGFR-2 inhibition and computational studies**

**Ahmed Sabt, Mohammed A. Khedr, Wagdy El dehna, Abelsamed I. Elshamy,  
Mohamed Fayed, Rasha M. Allam, Rasha Z. Batran**

- **<sup>1</sup>HNMR and <sup>13</sup>CNMR of the newly synthesized compounds.**
- **Molecular docking study against BRAF<sup>V600E</sup>**
- **Molecular docking study against VEGFR-2**
- **ADME Prediction Study**

- $^1\text{H}$ NMR and  $^{13}\text{C}$ NMR of the newly synthesized compounds.

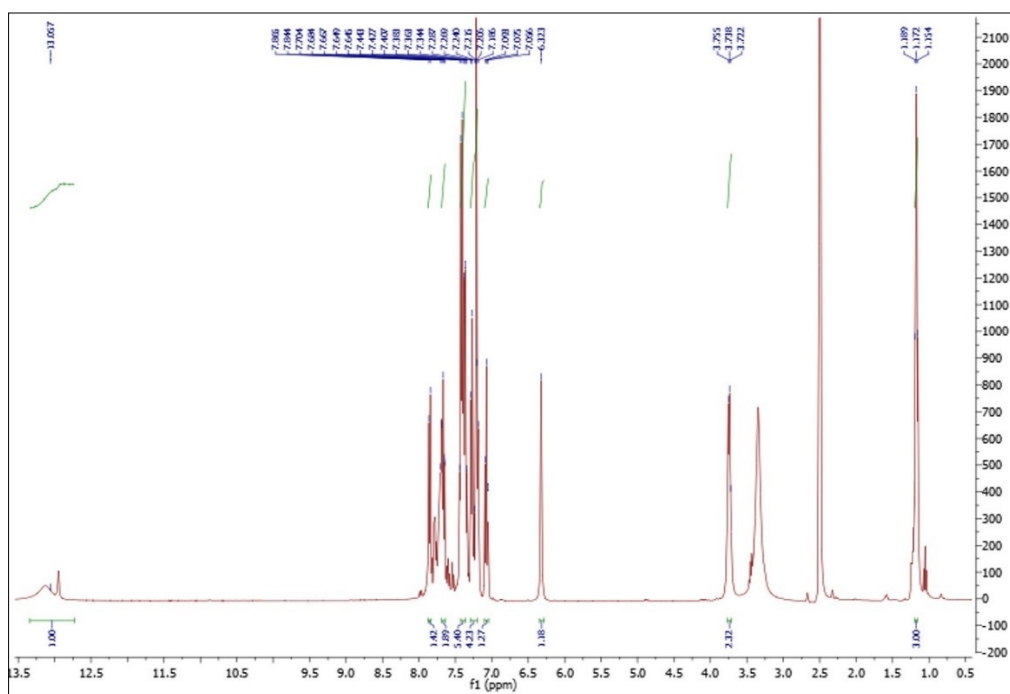

$^1\text{H}$ NMR of compound 4b

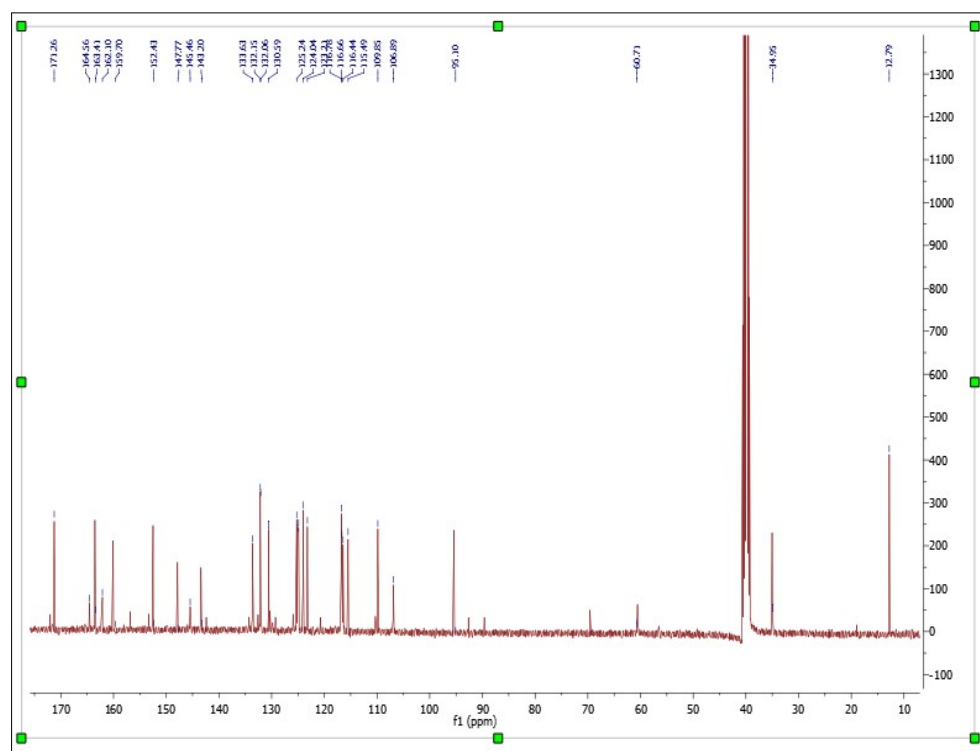

$^{13}\text{C}$ NMR of compound 4b

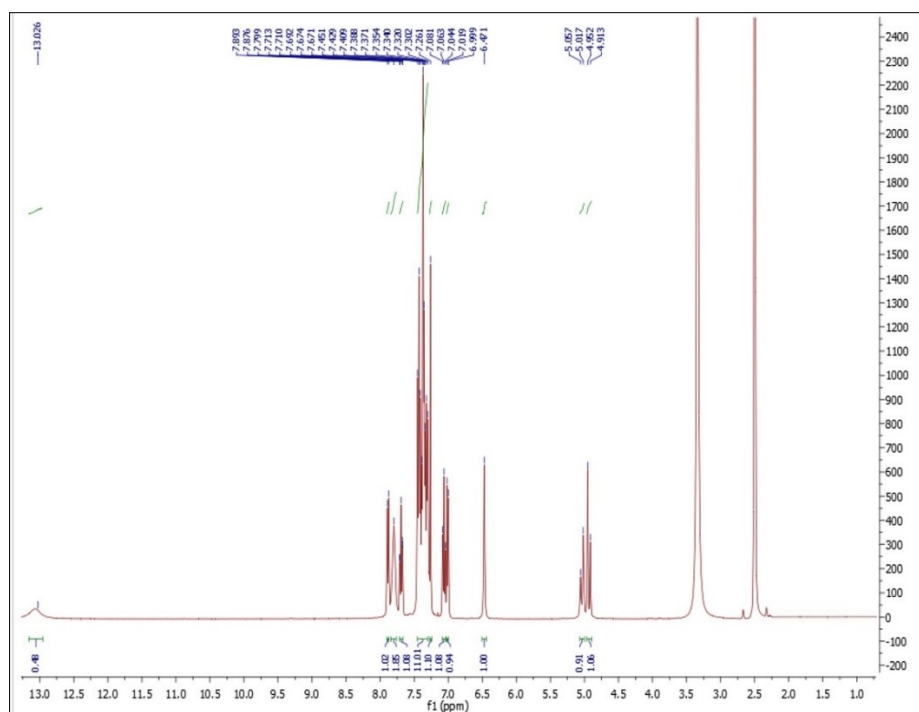

**<sup>1</sup>H NMR of compound 4c**

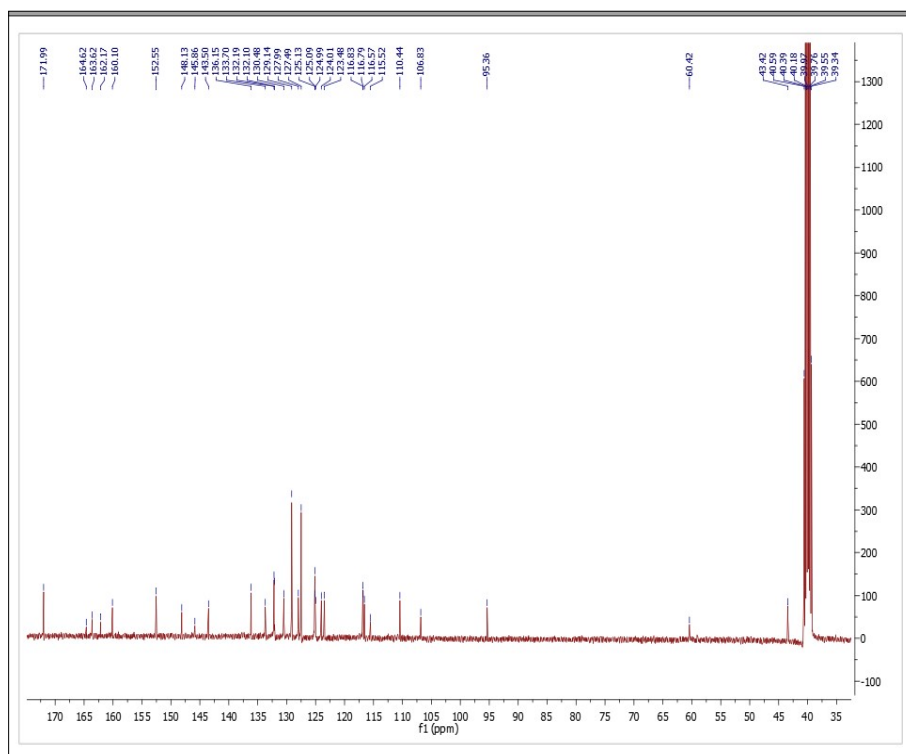

**<sup>13</sup>C NMR of compound 4c**

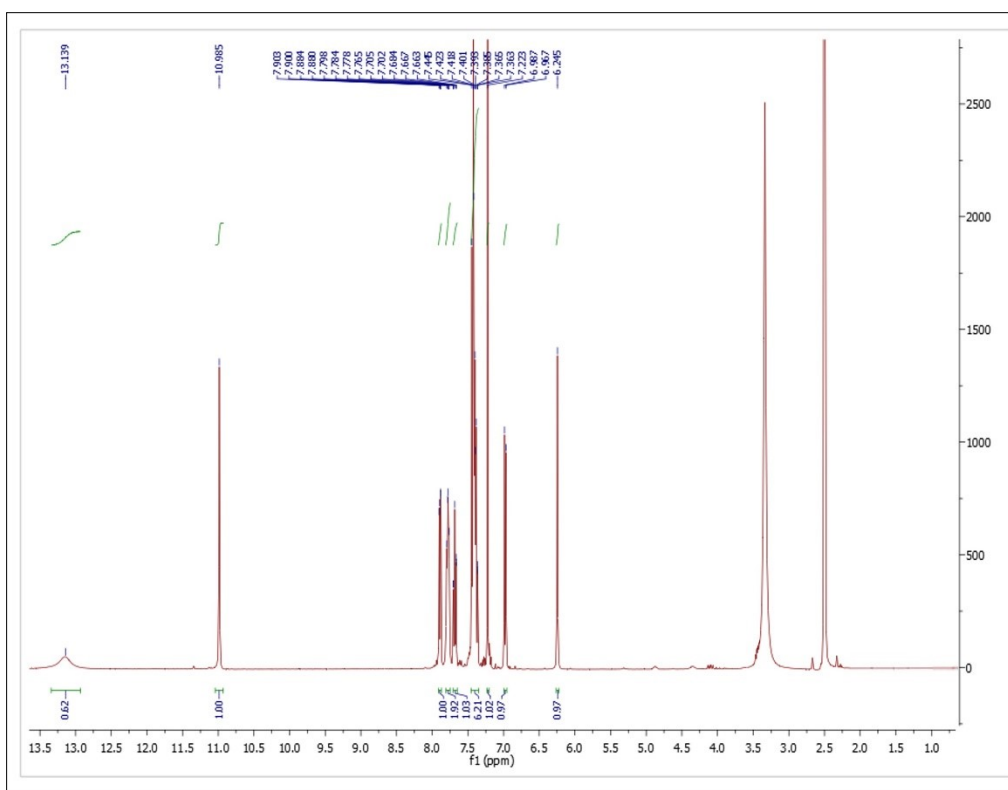

**<sup>1</sup>H NMR of compound 4d**

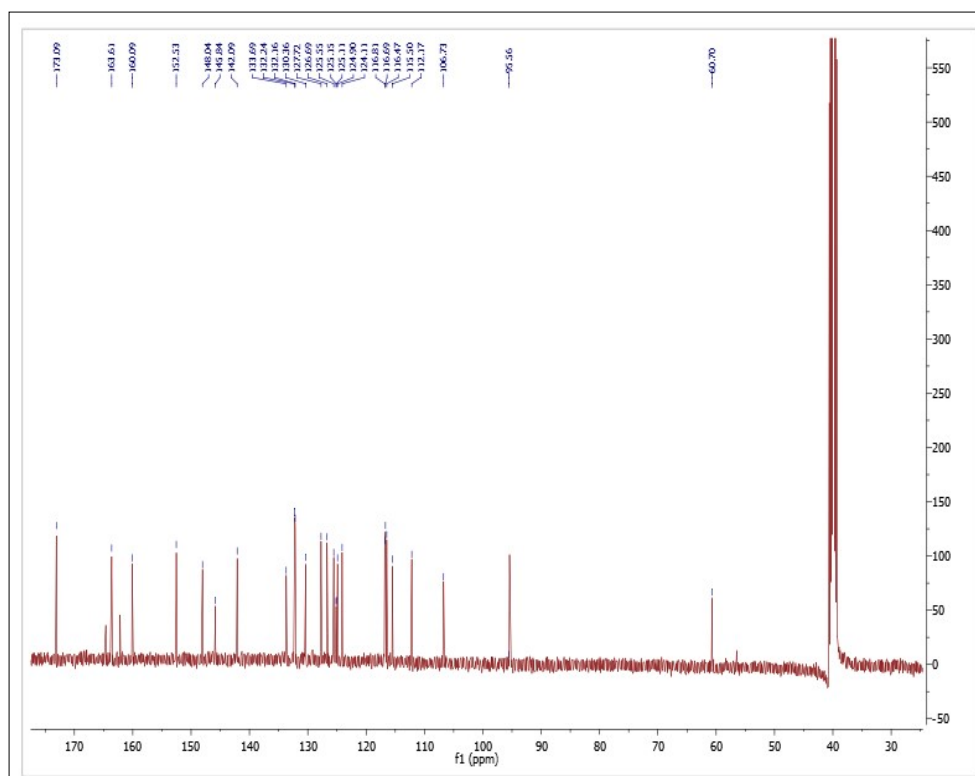

**<sup>13</sup>C NMR of compound 4d**

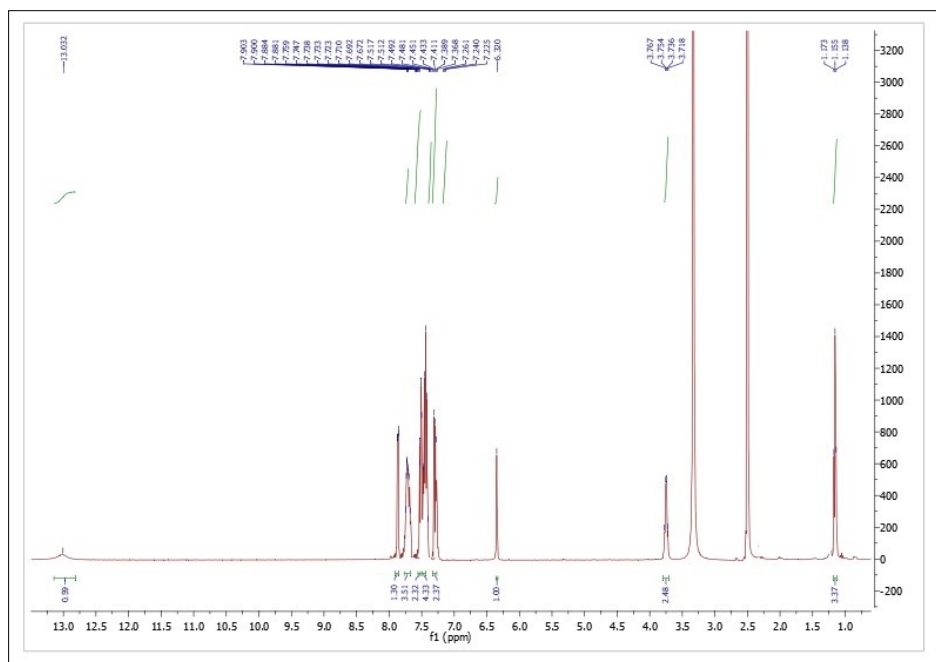

**<sup>1</sup>H NMR of compound 4e**

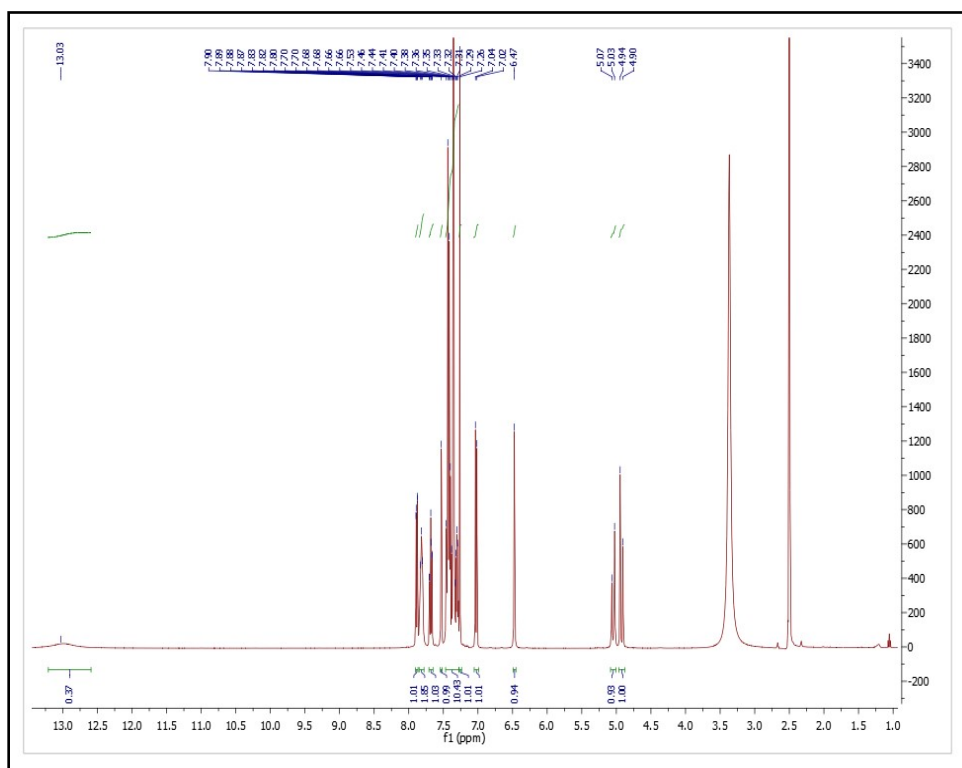

**<sup>1</sup>H NMR of compound 4f**

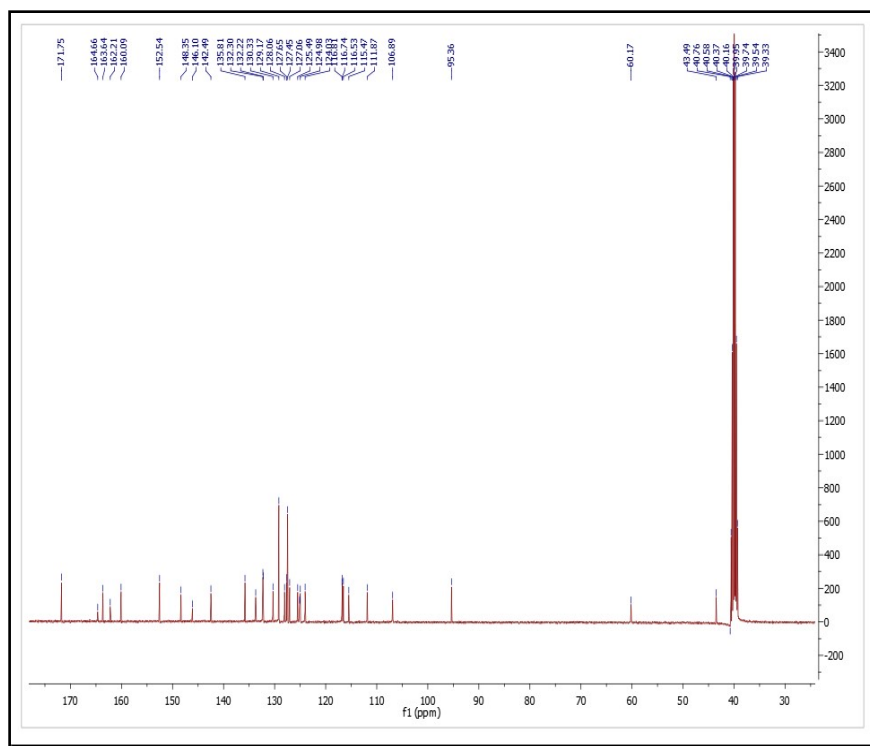

**<sup>13</sup>CNMR of compound 4f**

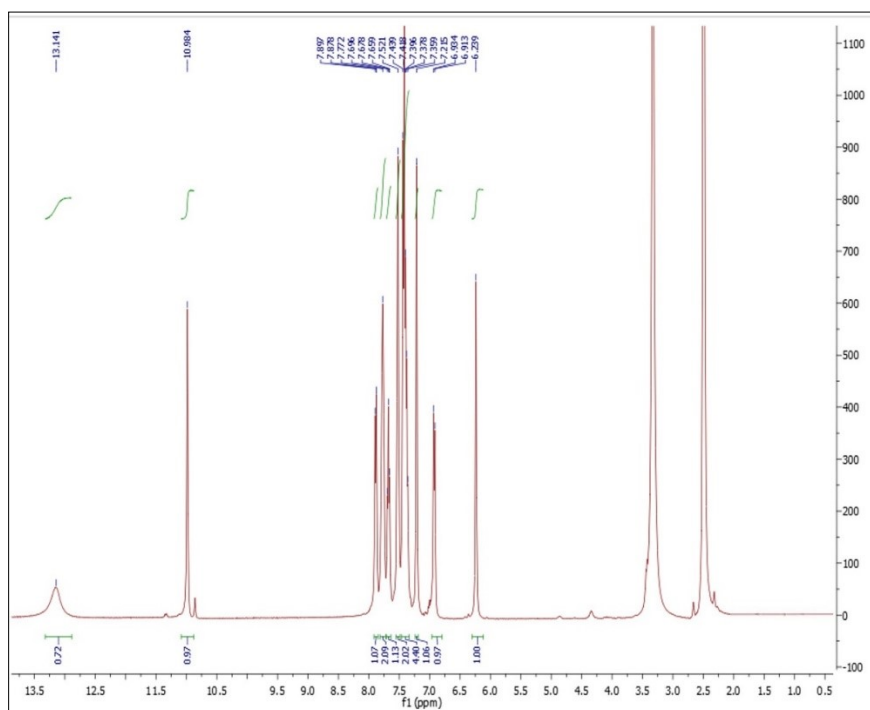

**<sup>1</sup>HNMR of compound 4g**





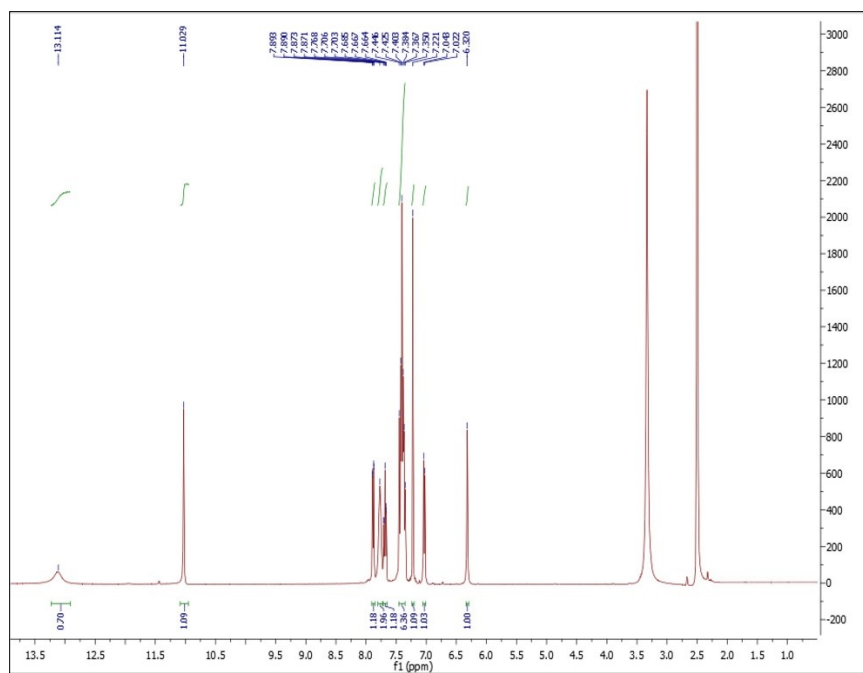

**<sup>1</sup>H NMR of compound 4j**

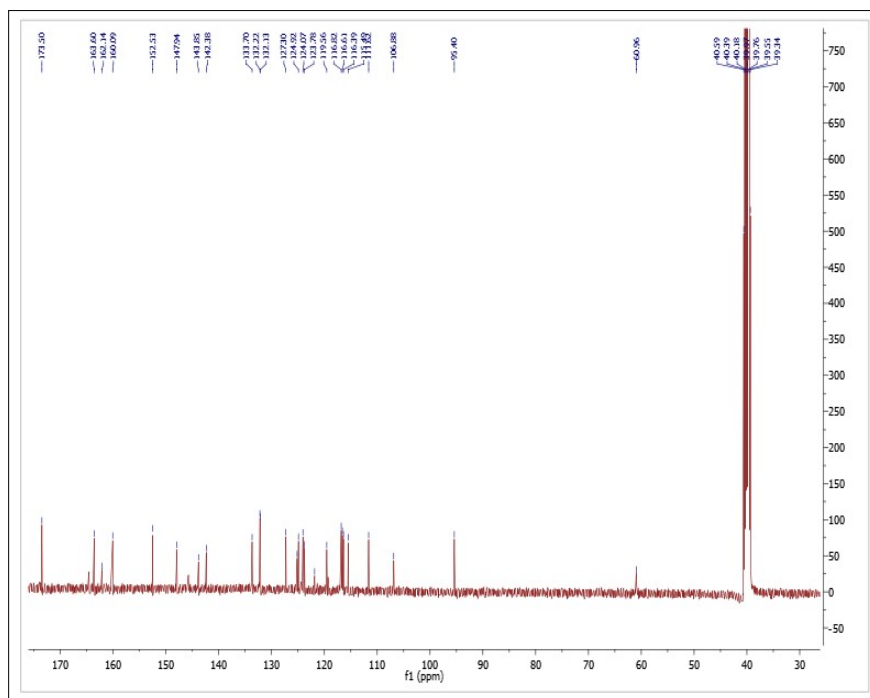

**<sup>13</sup>C NMR of compound 4j**

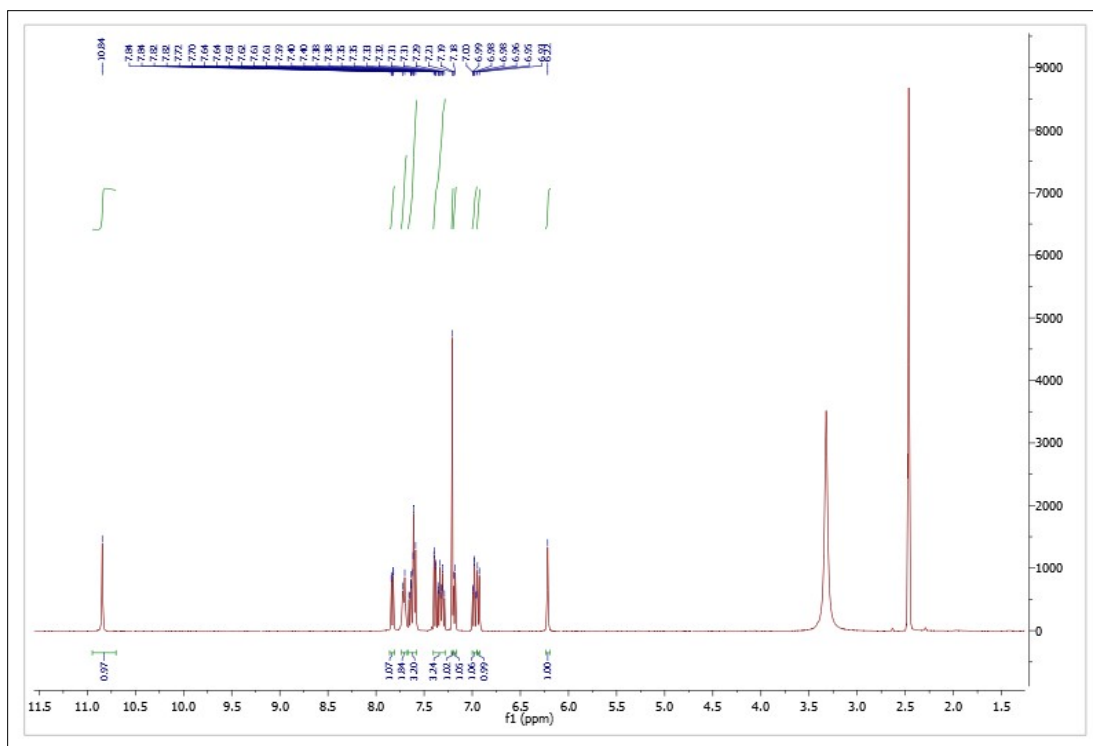

**<sup>1</sup>H NMR of compound 5a**

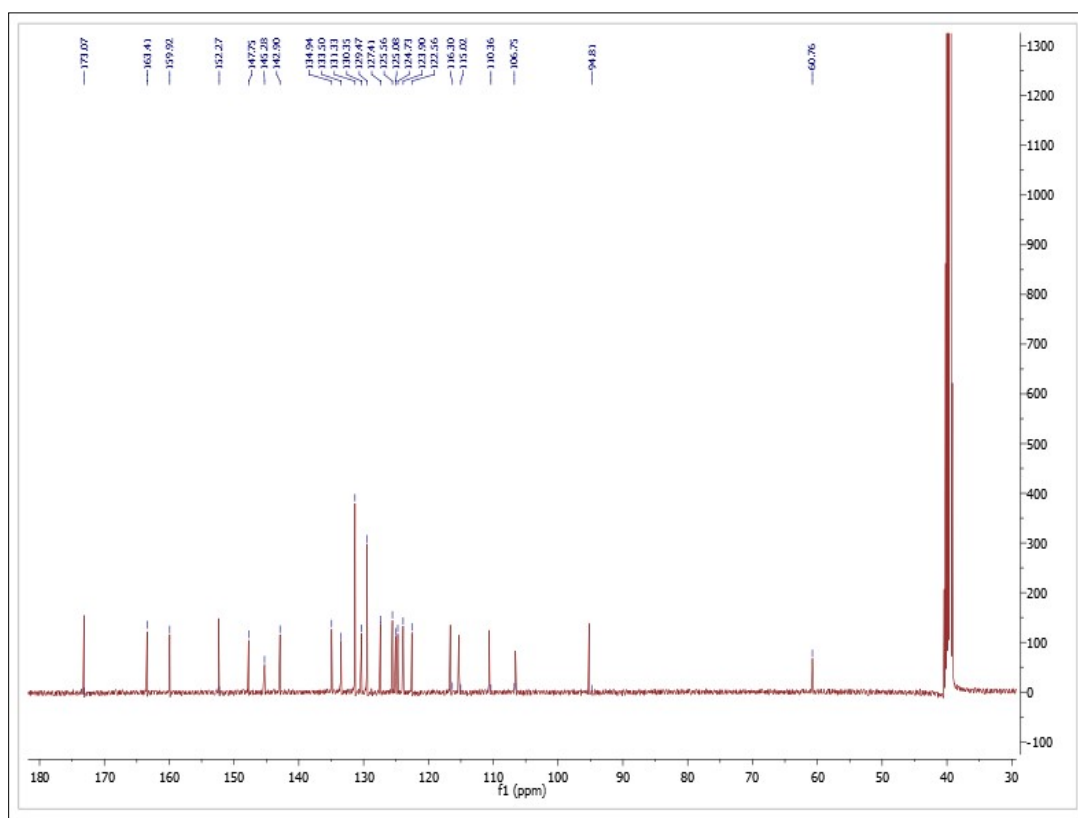

**<sup>13</sup>C NMR of compound 5a**

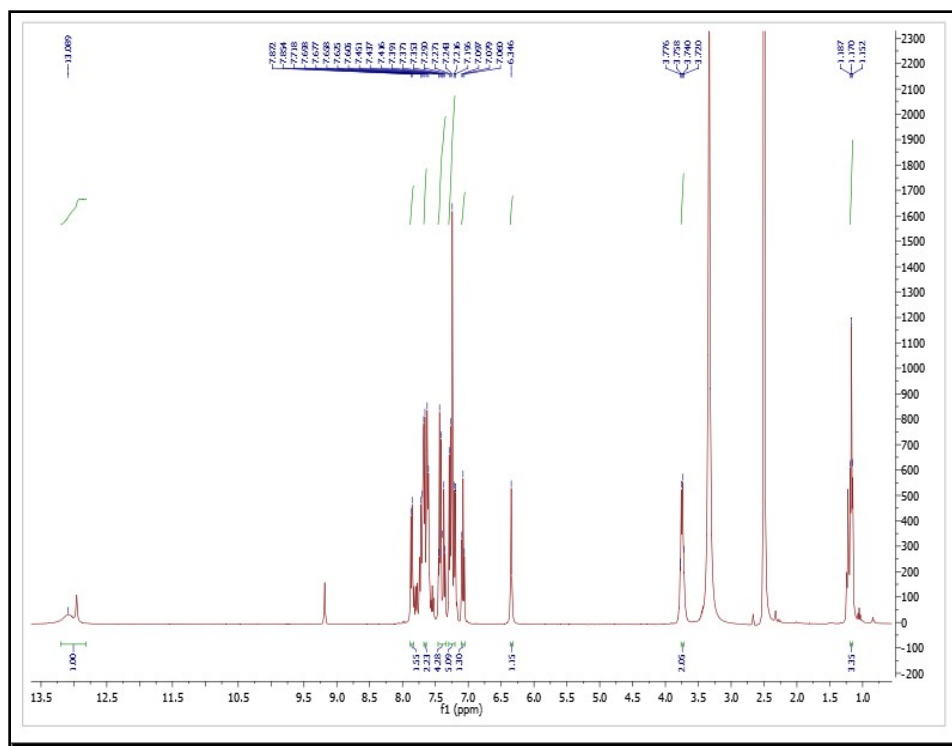

**<sup>1</sup>H NMR of compound 5b**

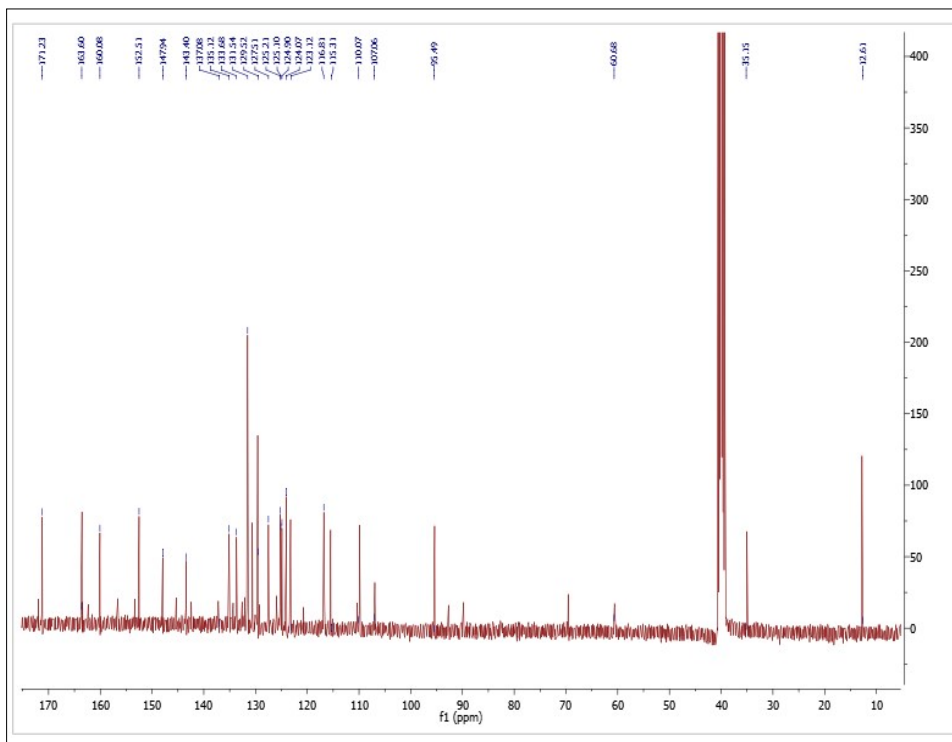

**<sup>13</sup>C NMR of compound 5b**

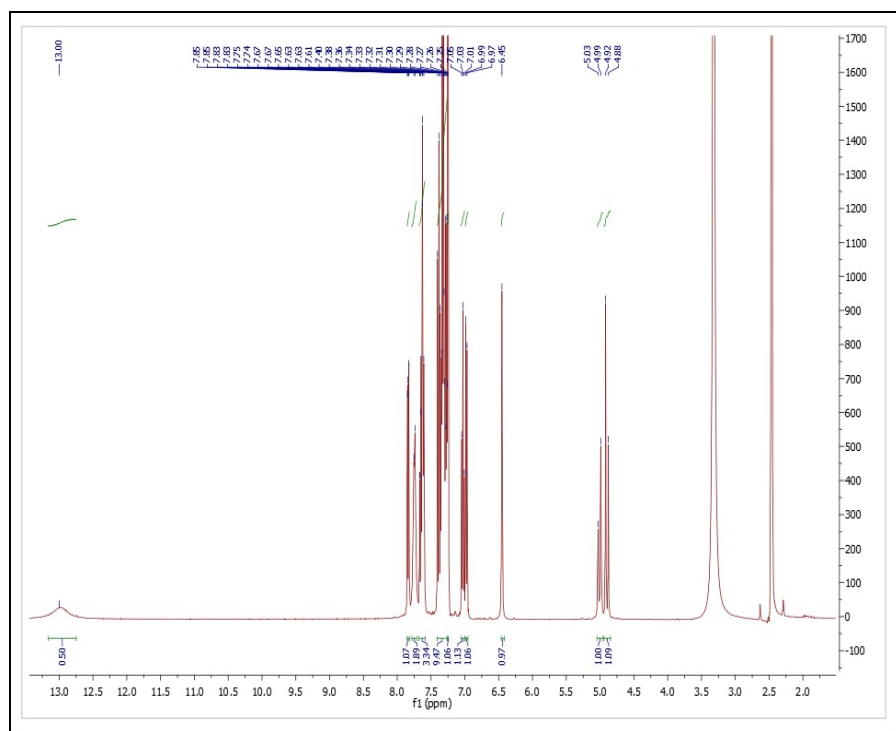

**<sup>1</sup>H NMR compound 5c**

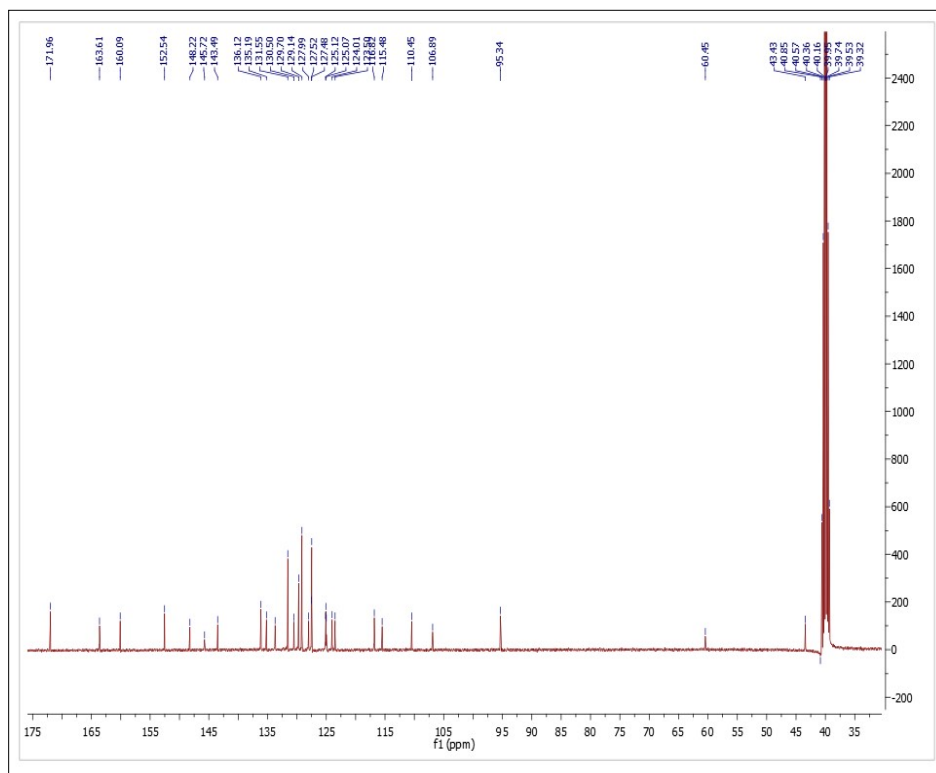

**<sup>13</sup>C NMR of compound 5c**

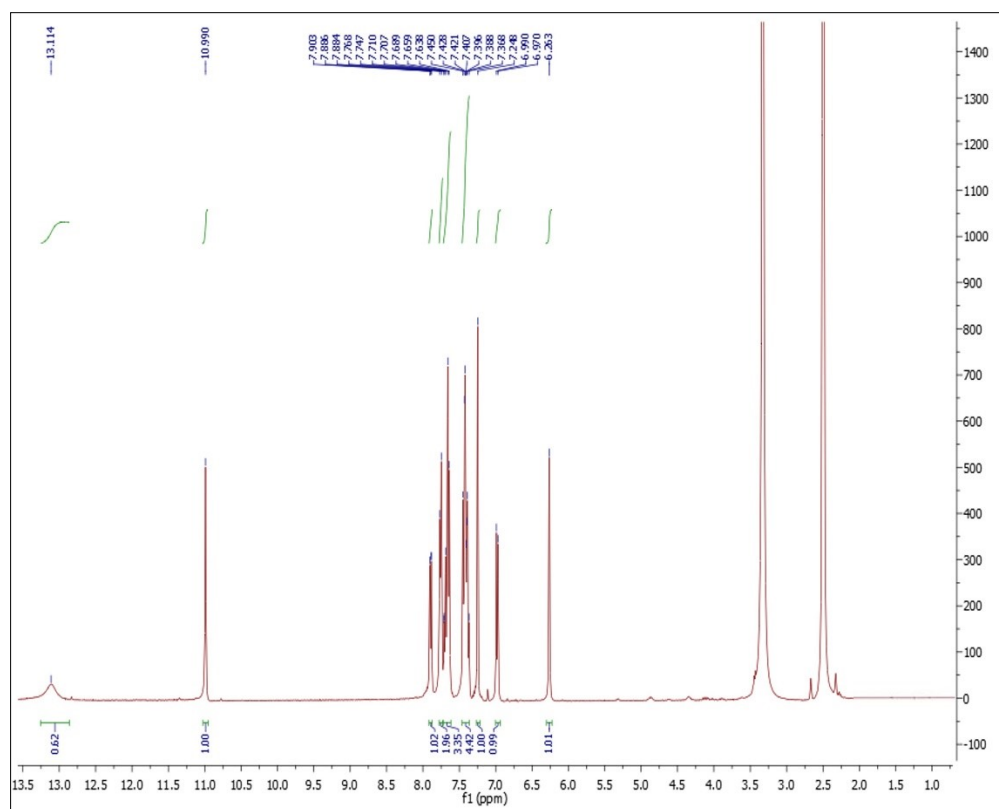

**<sup>1</sup>H NMR of compound 5d**

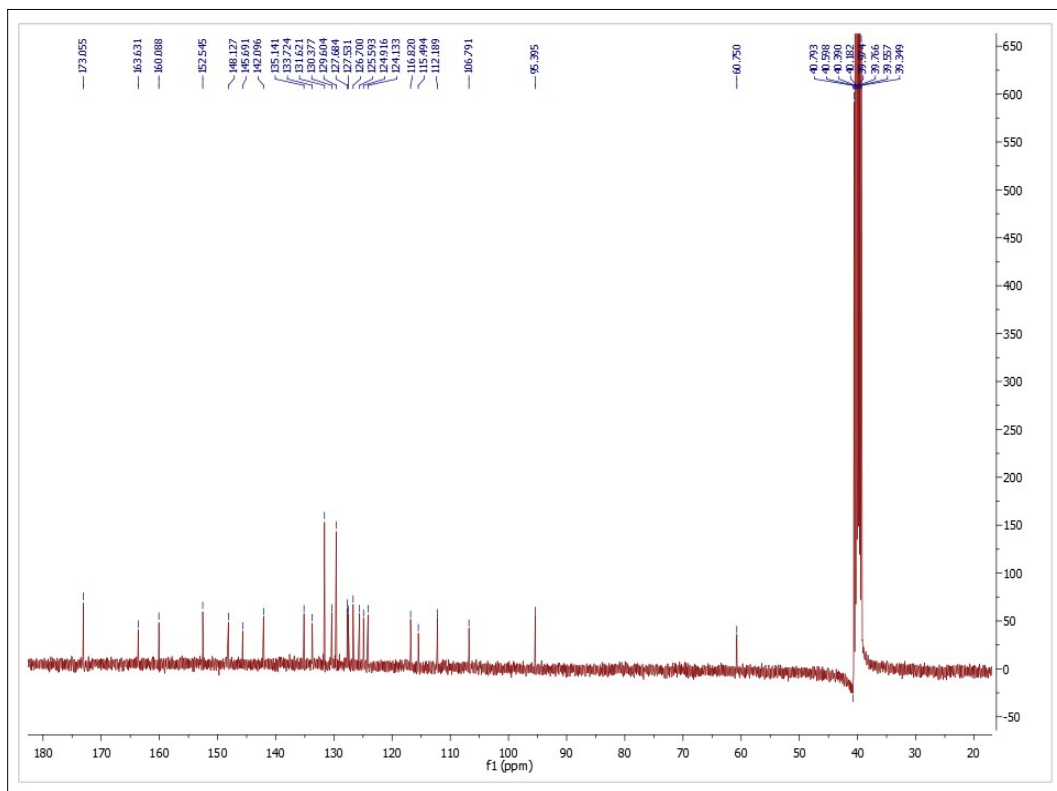

**<sup>13</sup>C NMR of compound 5d**

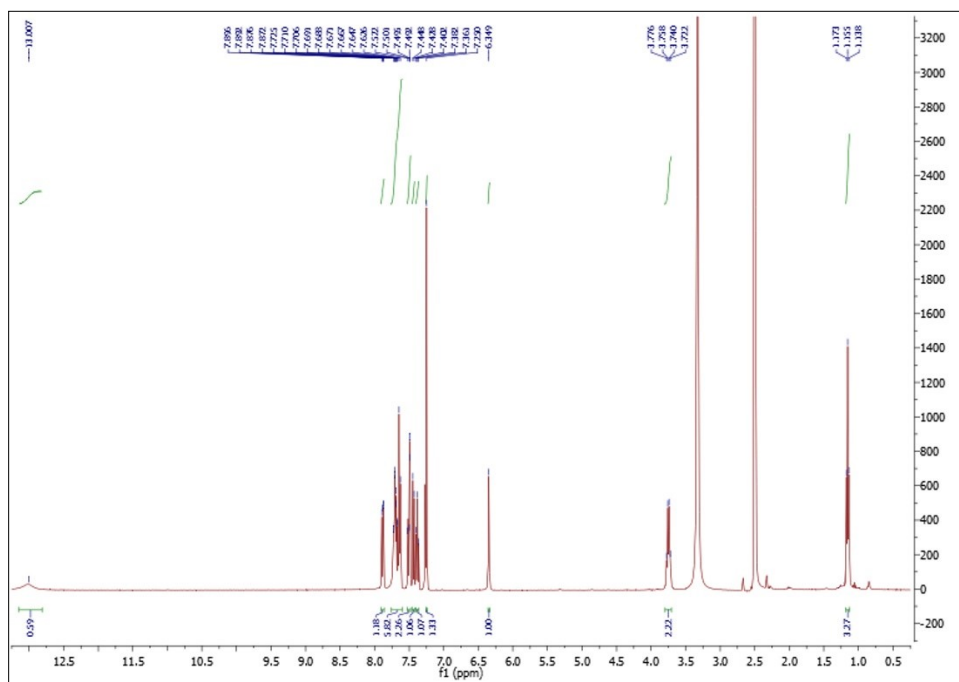

**<sup>1</sup>H NMR of compound 5e**

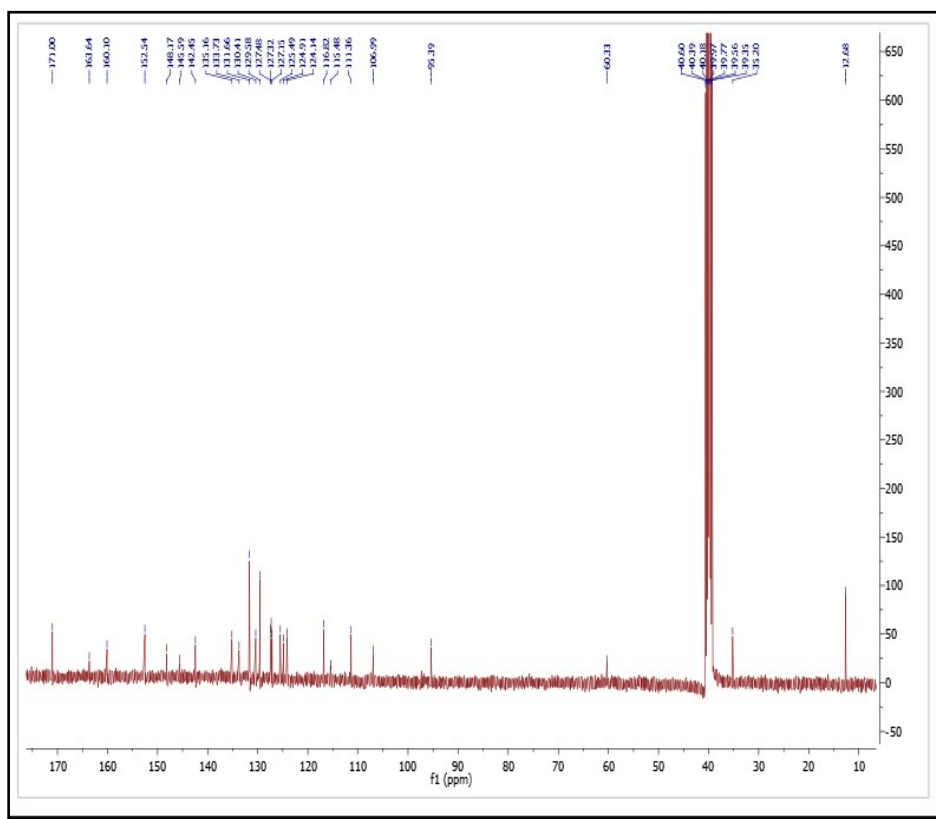

**<sup>13</sup>C NMR of compound 5e**

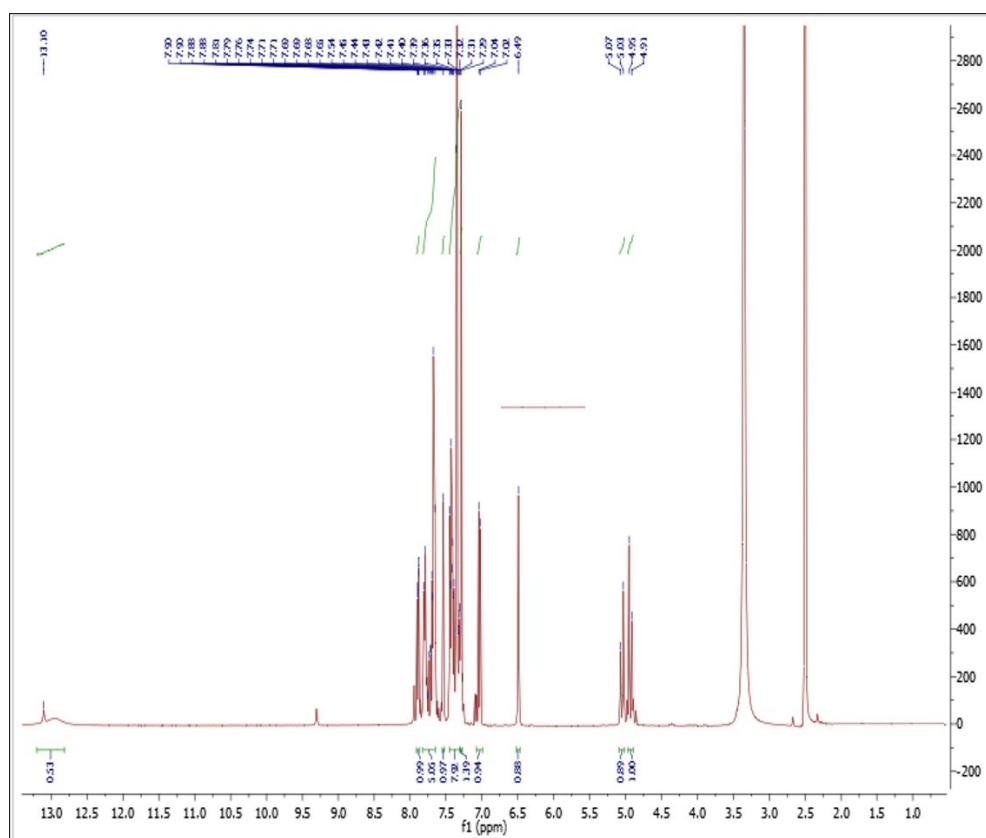

**<sup>1</sup>H NMR of compound 5f**

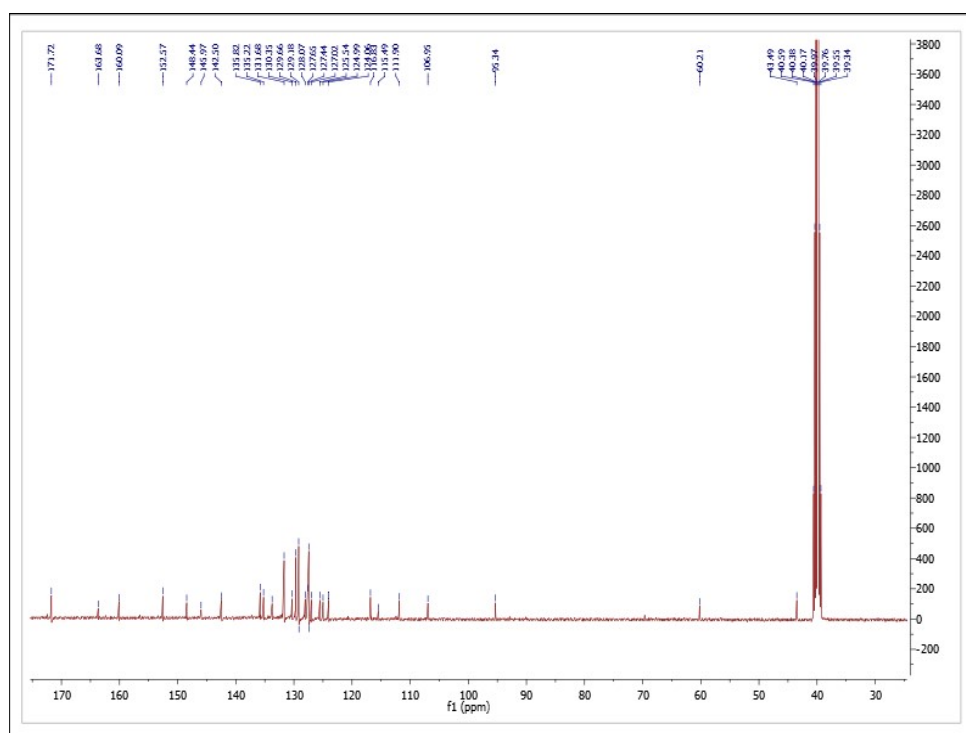

**<sup>13</sup>C NMR of compound 5f**

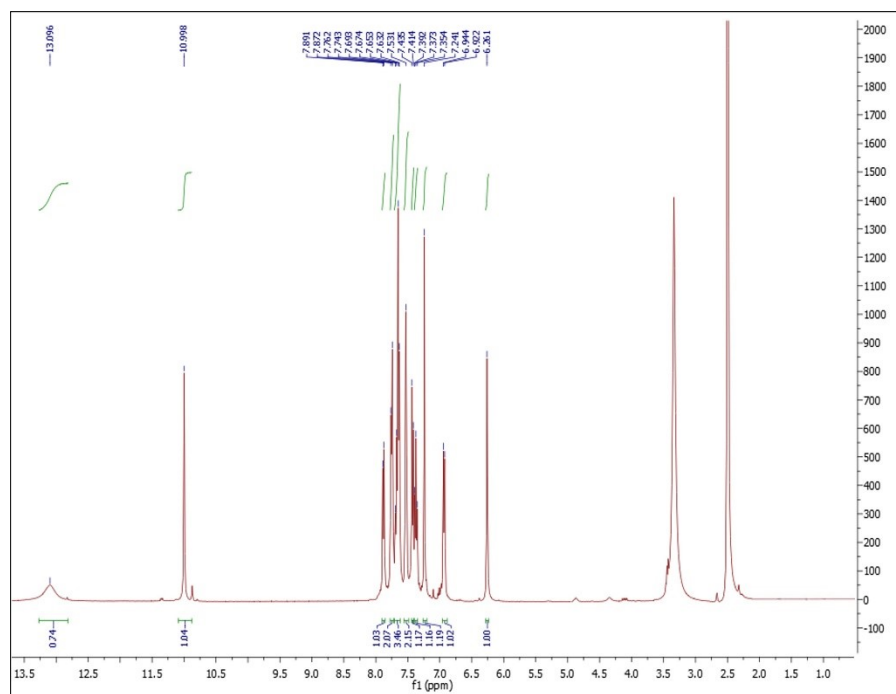

**<sup>1</sup>H NMR of compound 5g**

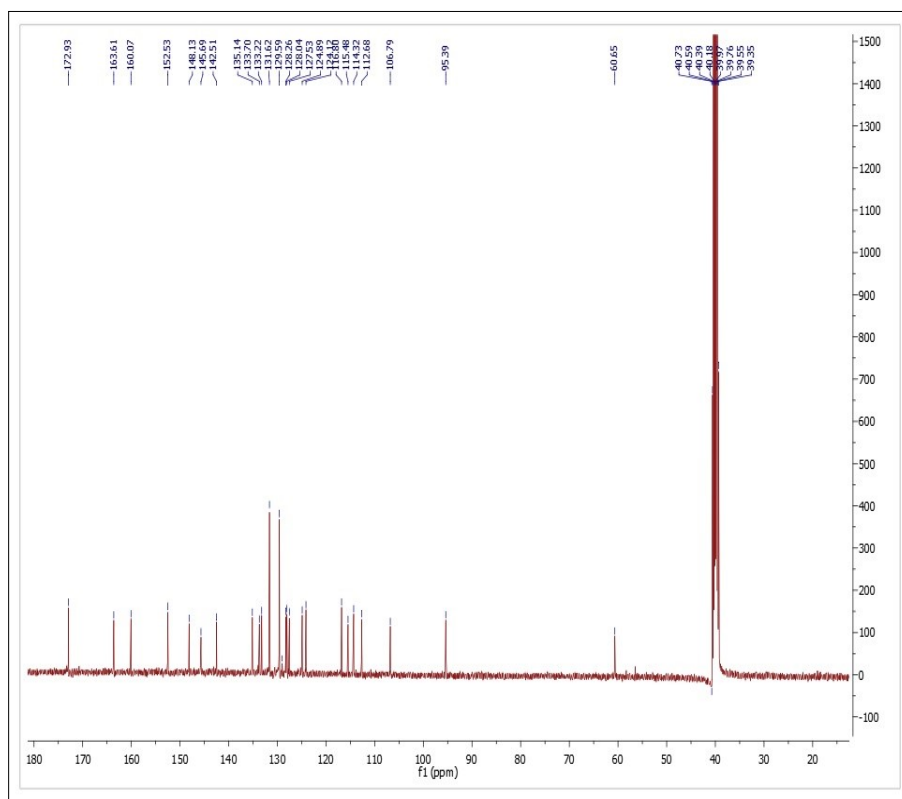

**<sup>13</sup>C NMR of compound 5g**

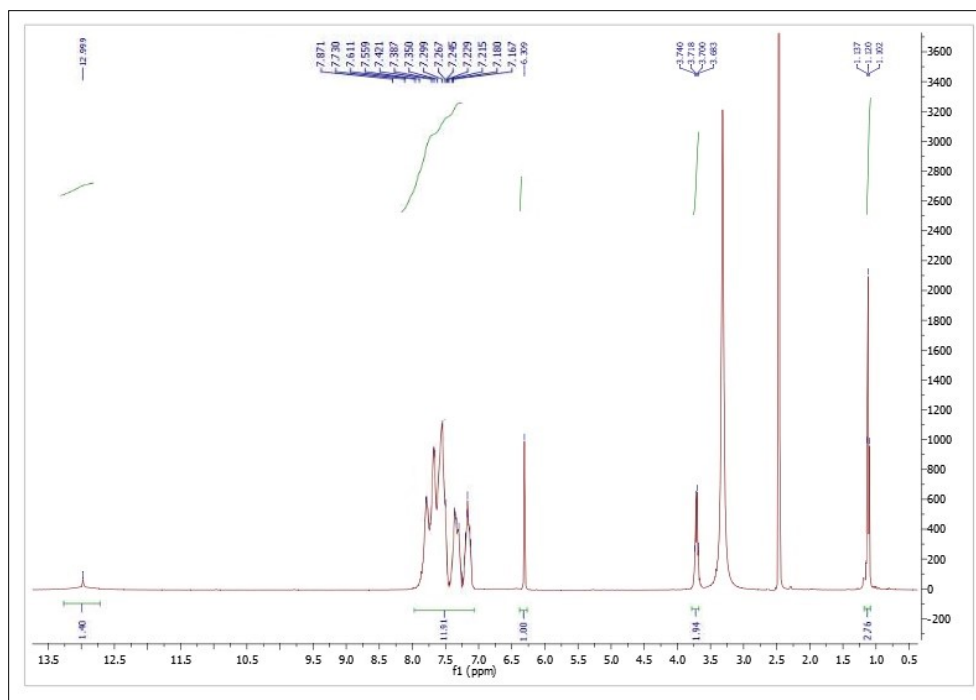

**<sup>1</sup>H NMR of compound 5h**

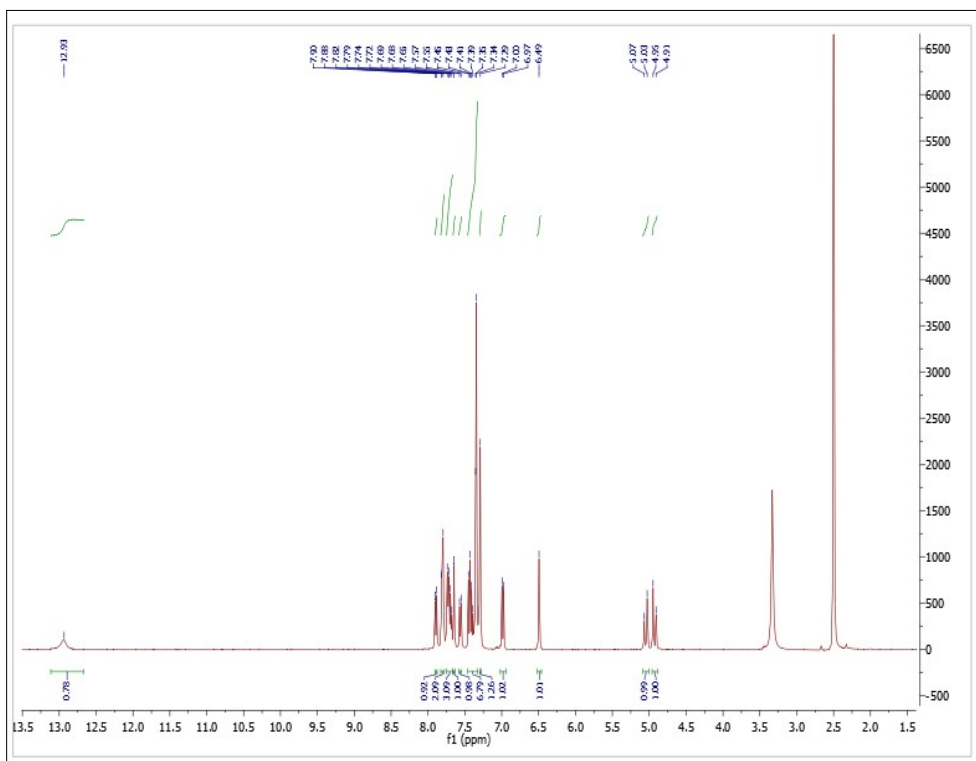

**<sup>1</sup>H NMR of compound 5i**

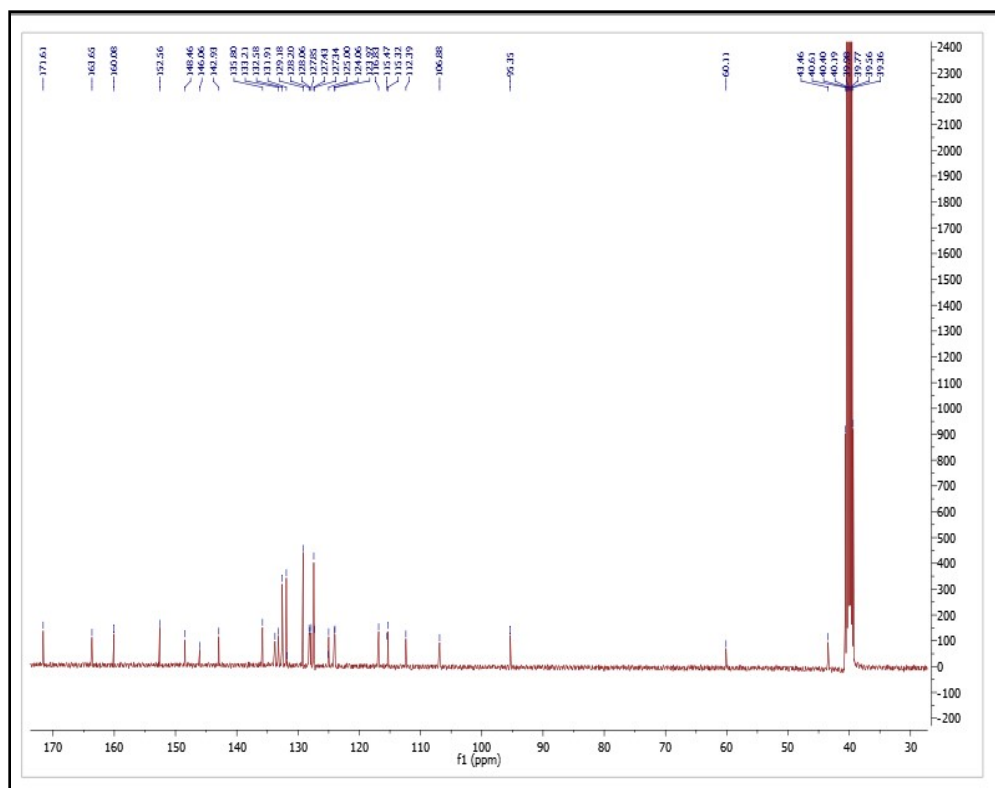

**$^{13}\text{C}$ NMR of compound 5i**

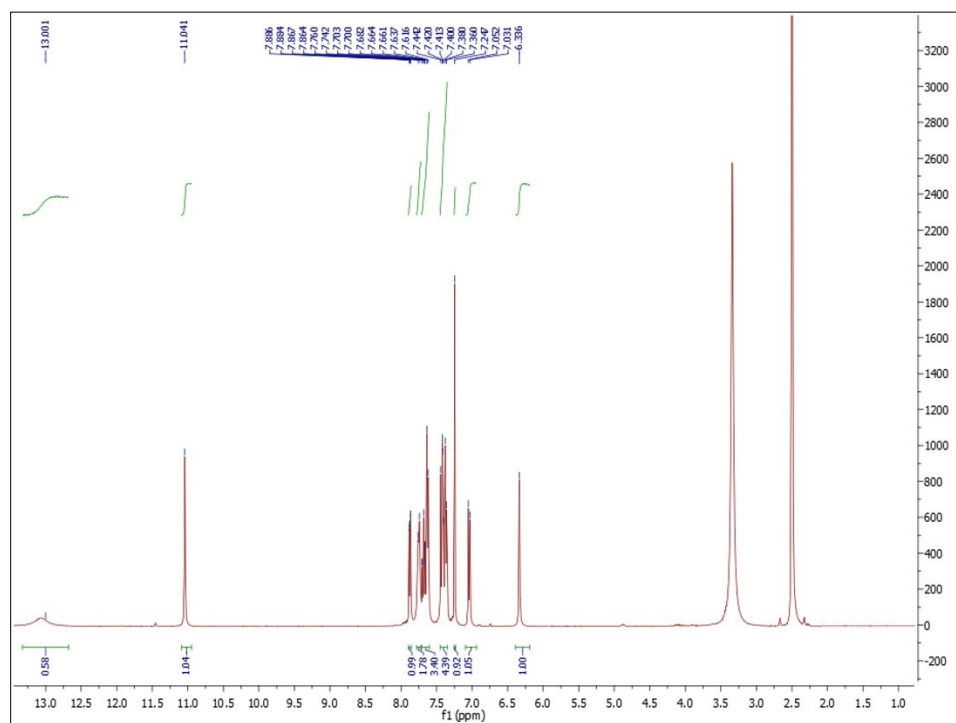

**$^1\text{H}$ NMR of compound 5j**

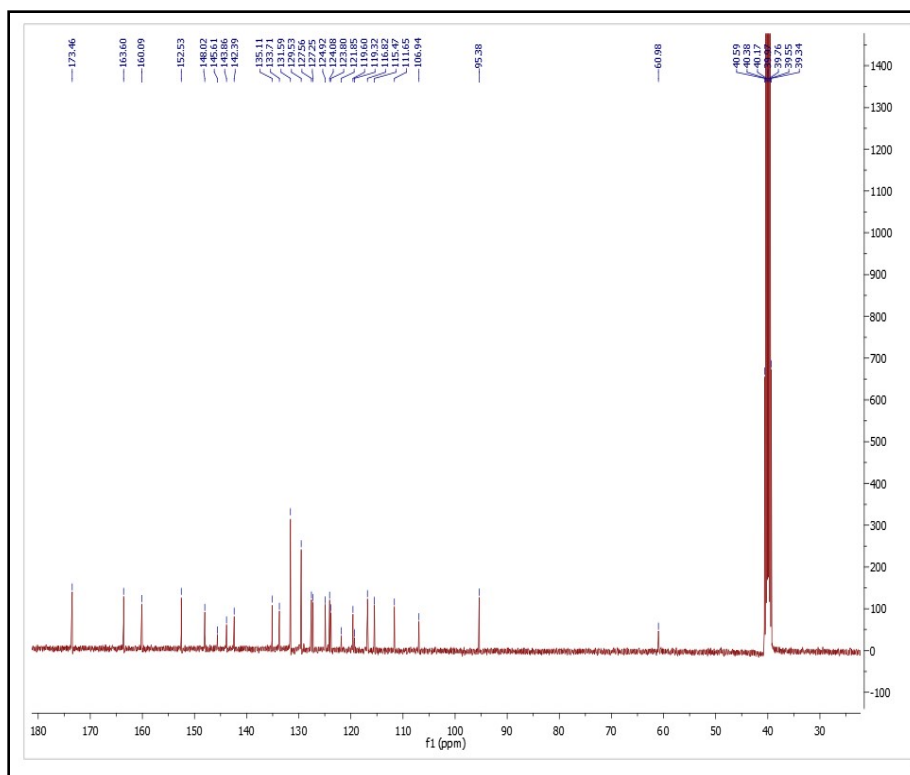

$^{13}\text{C}$ NMR of compound 5j

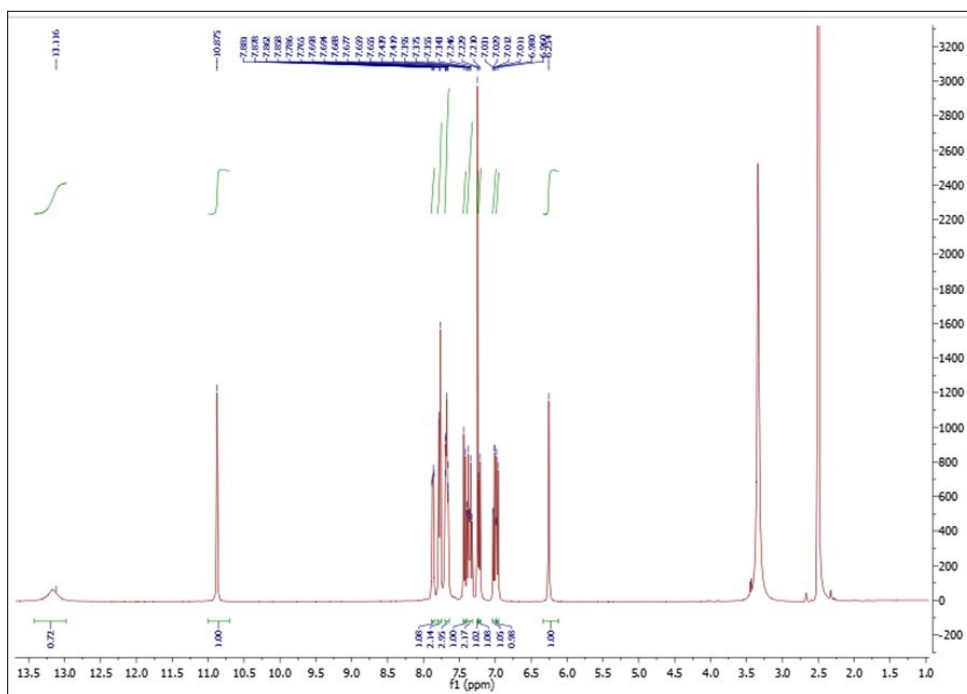

$^1\text{H}$ NMR of compound 6a

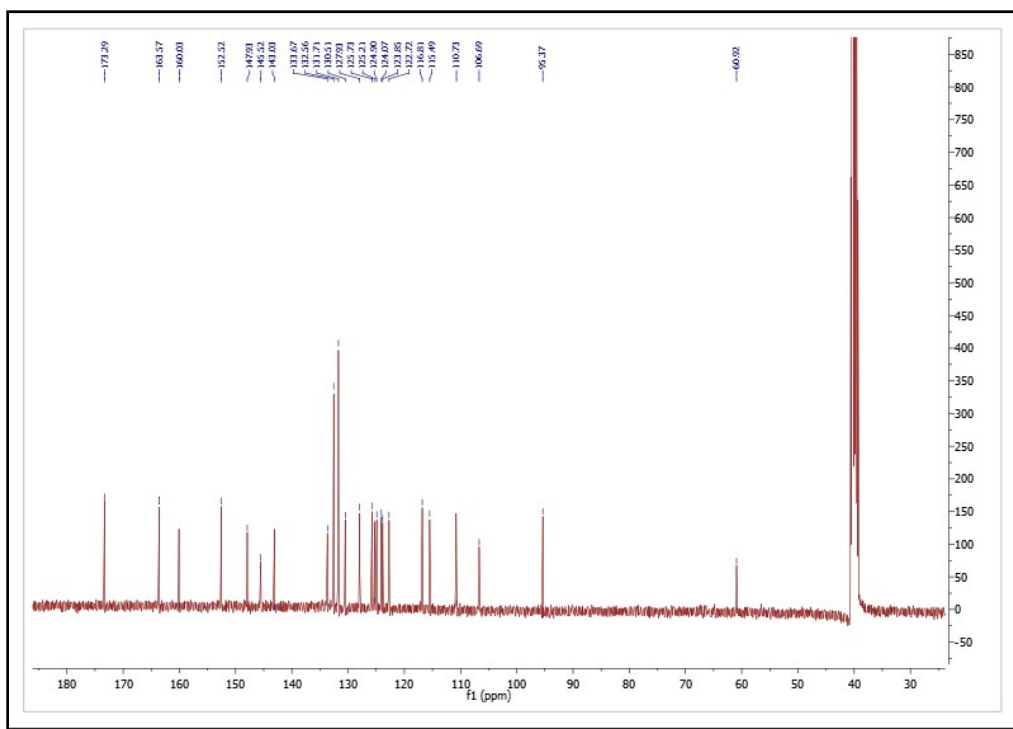

**<sup>13</sup>CNMR of compound 6a**

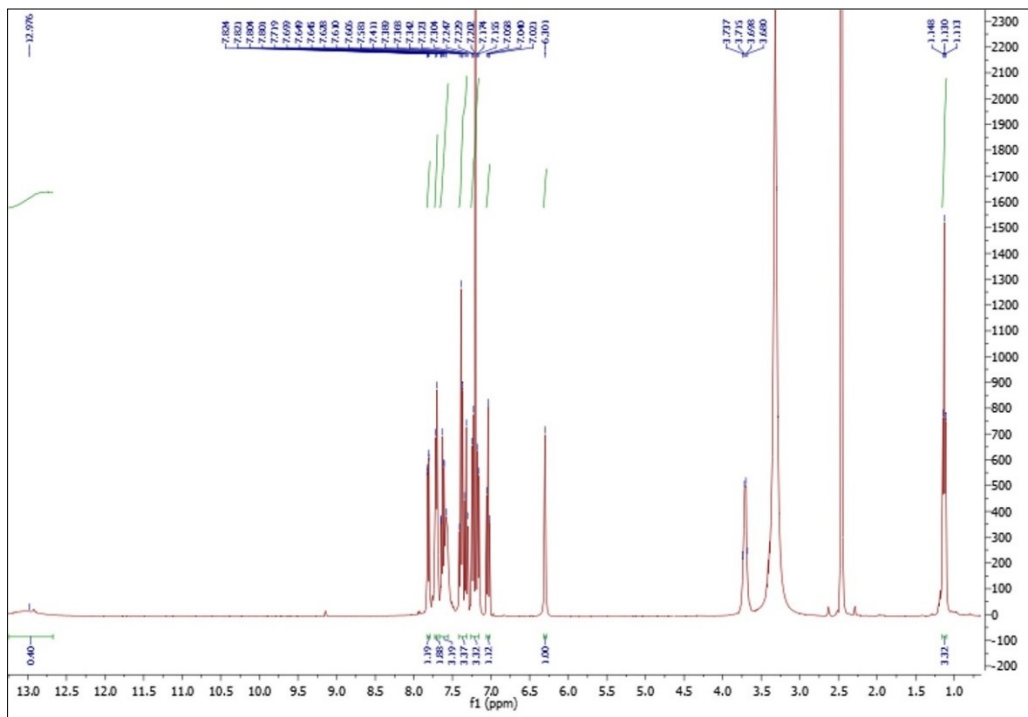

**<sup>1</sup>HNMR of compound 6b**

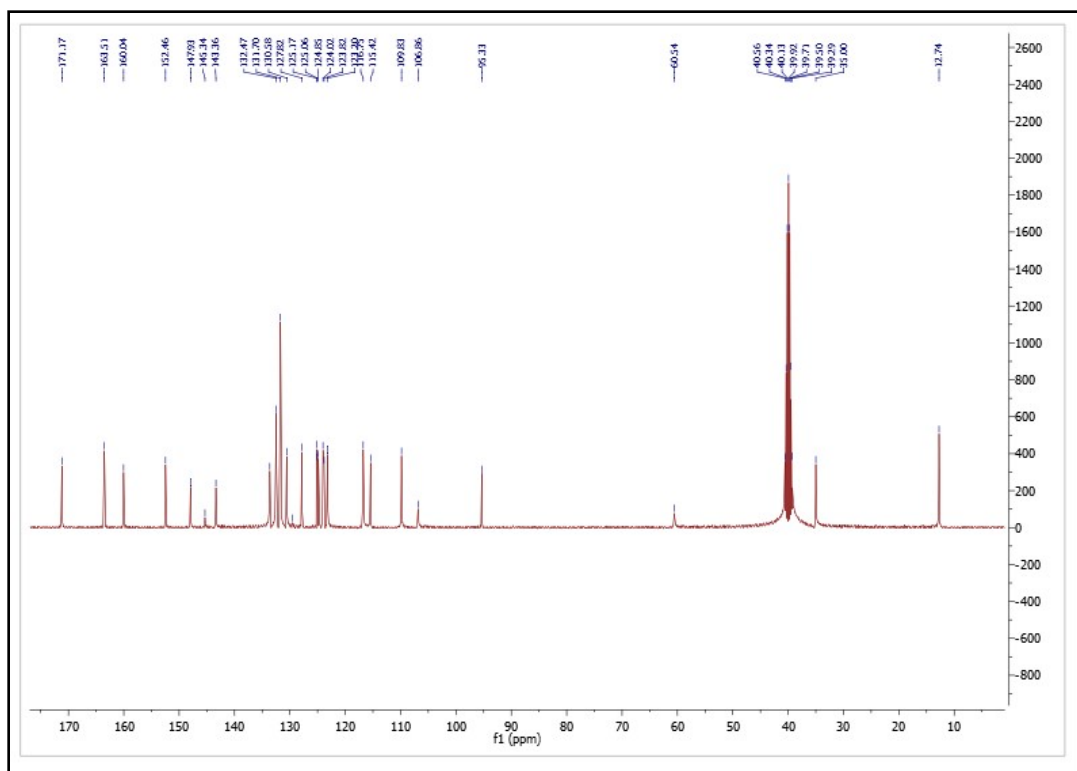

**<sup>13</sup>CNMR of compound 6b**

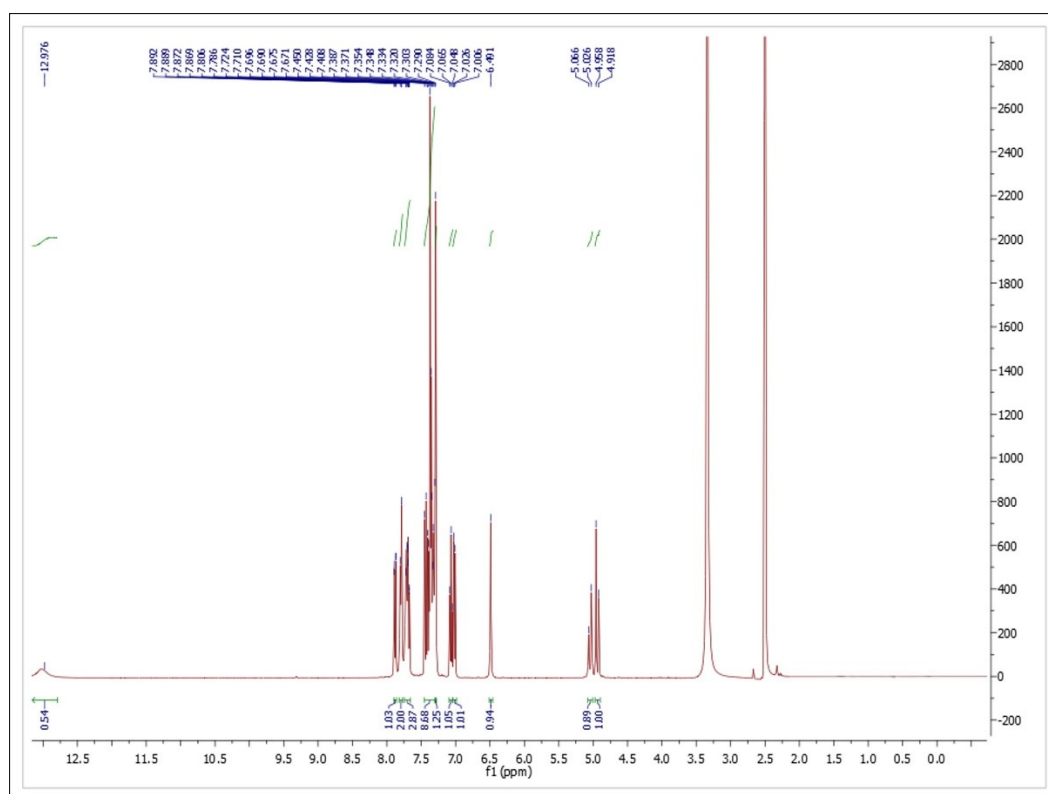

**<sup>1</sup>HNMR of compound 6c**

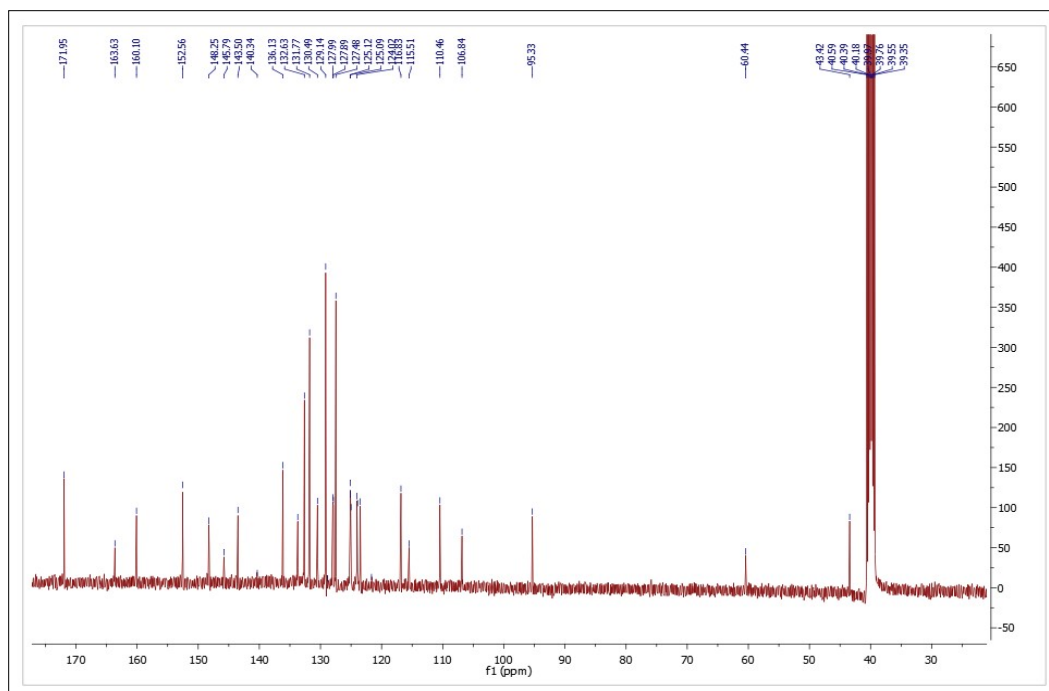

**<sup>13</sup>CNMR of compound 6c**

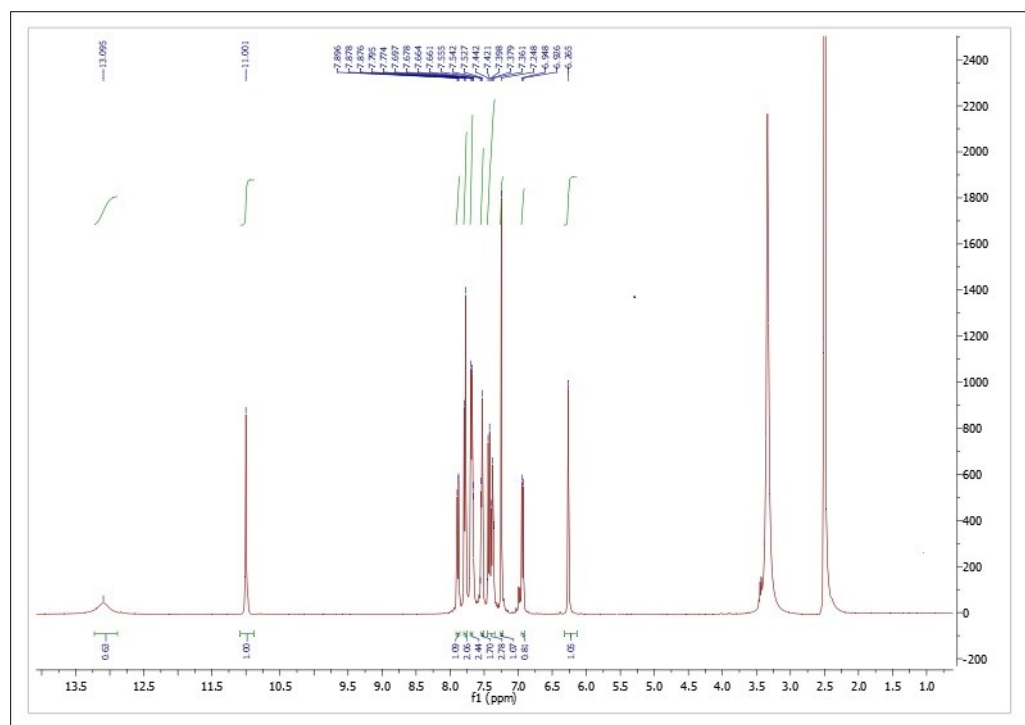

**<sup>1</sup>HNMR of compound 6d**

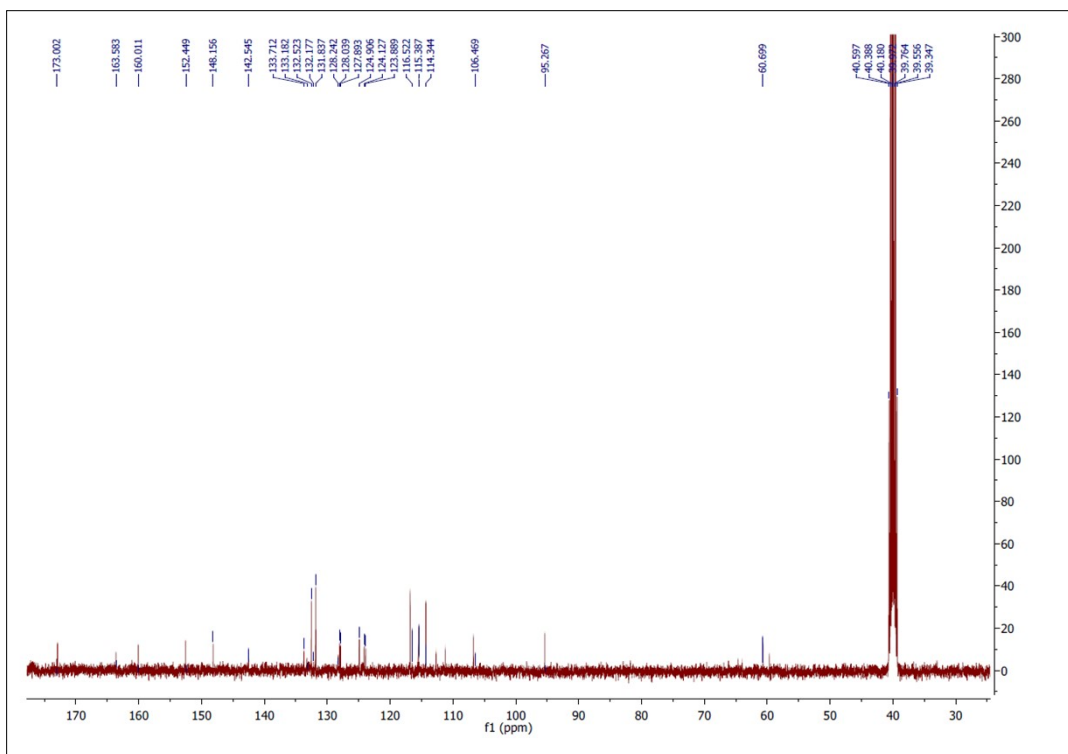

**<sup>13</sup>CNMR compound 6d**

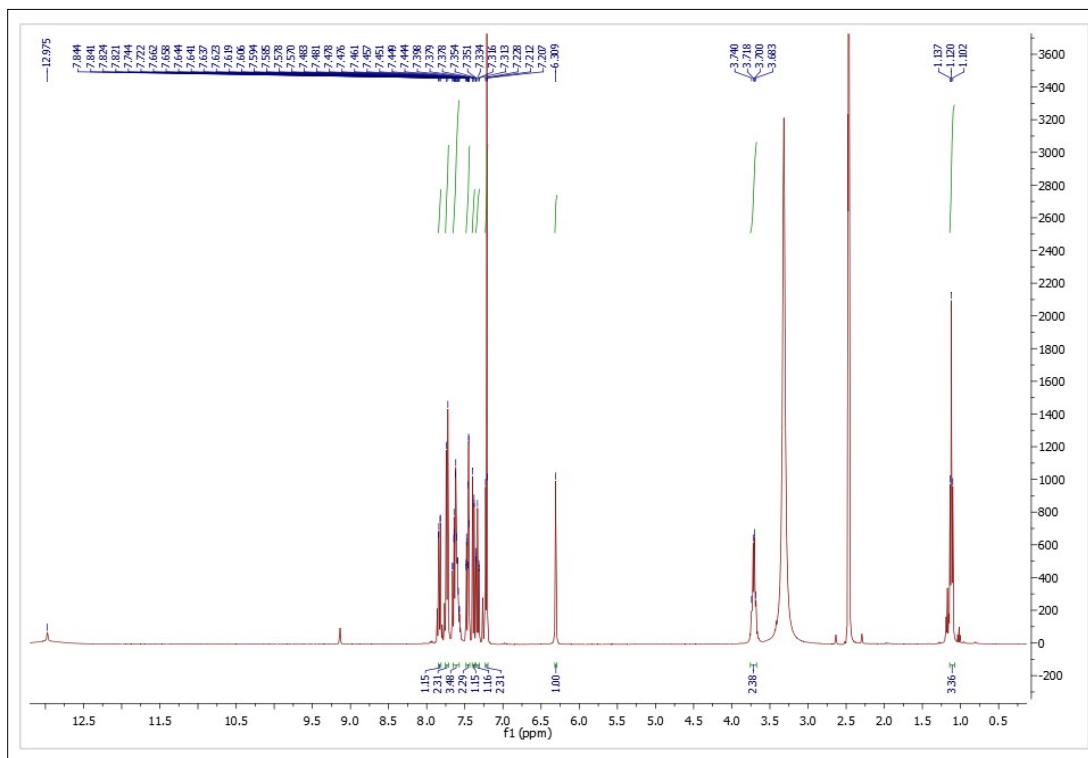

**<sup>1</sup>HNMR of compound 6c**

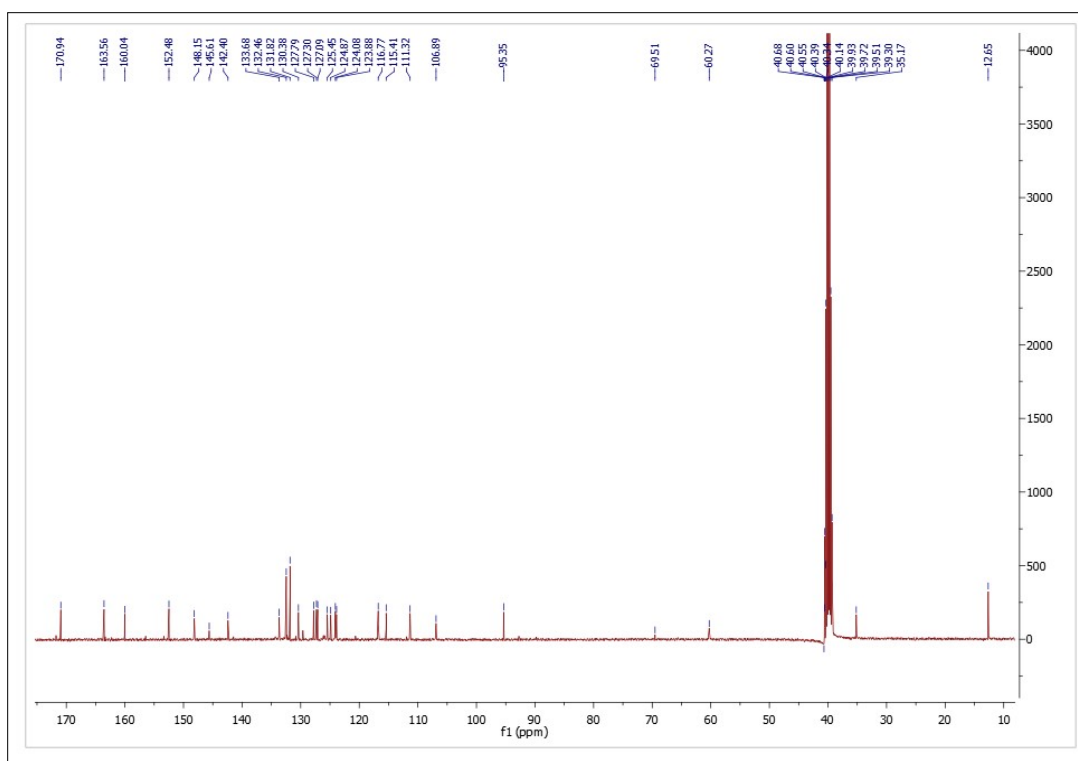

**<sup>13</sup>CNMR of compound 6e**

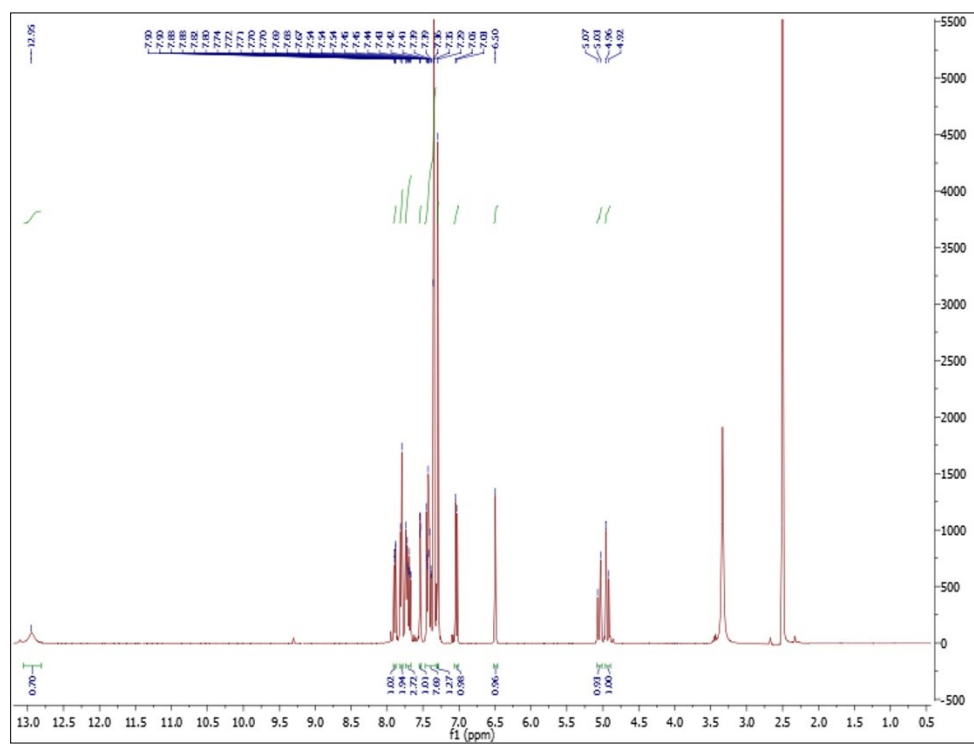

**<sup>1</sup>HNMR of compound 6f**

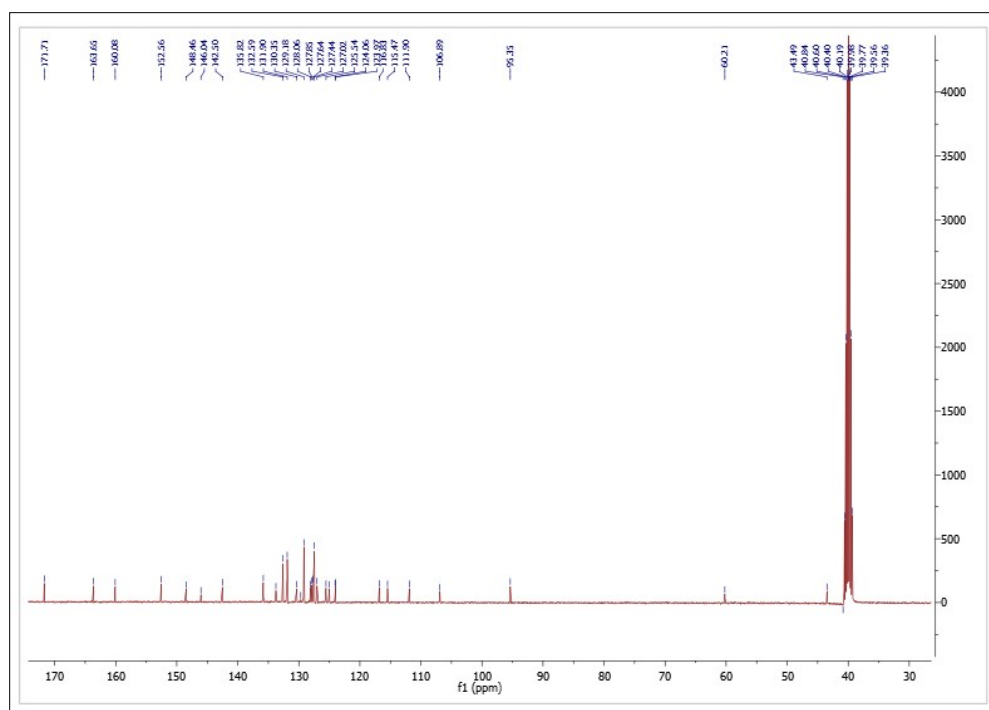

**<sup>13</sup>CNMR of compound 6f**

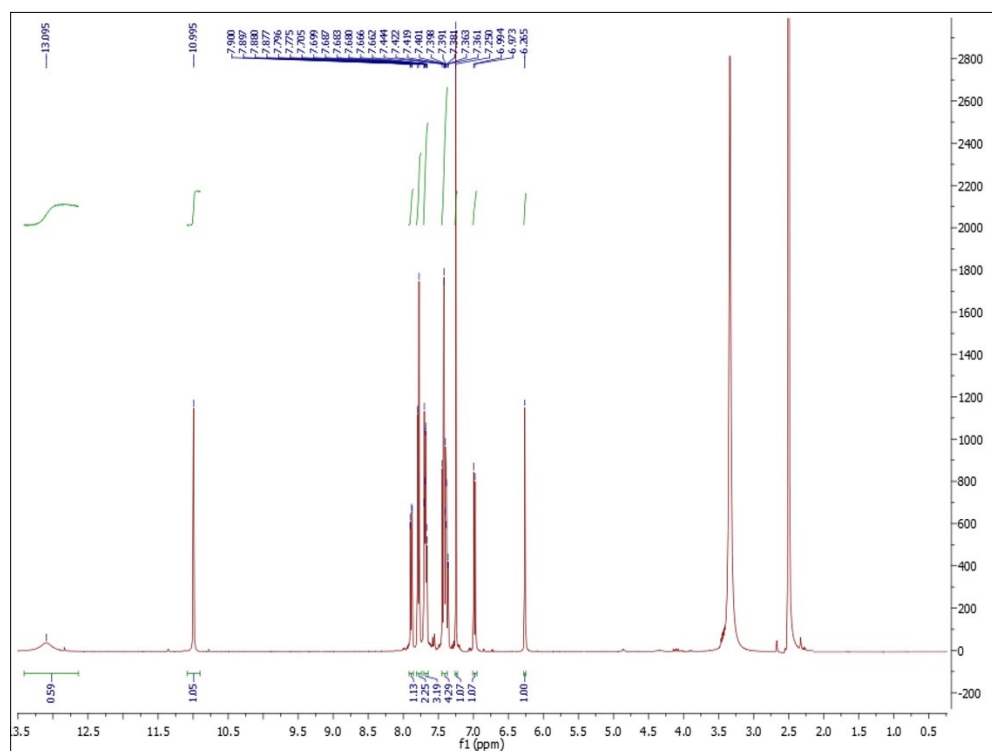

**<sup>1</sup>HNMR of compound 6g**

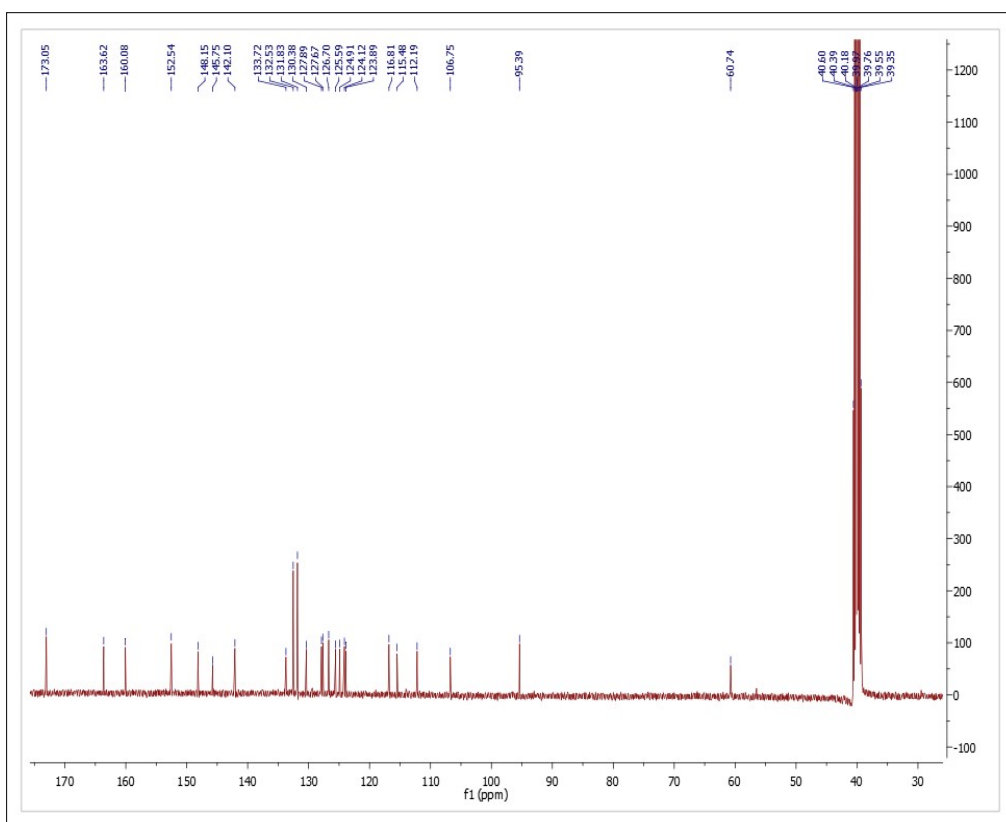

**<sup>13</sup>CNMR of compound 6g**

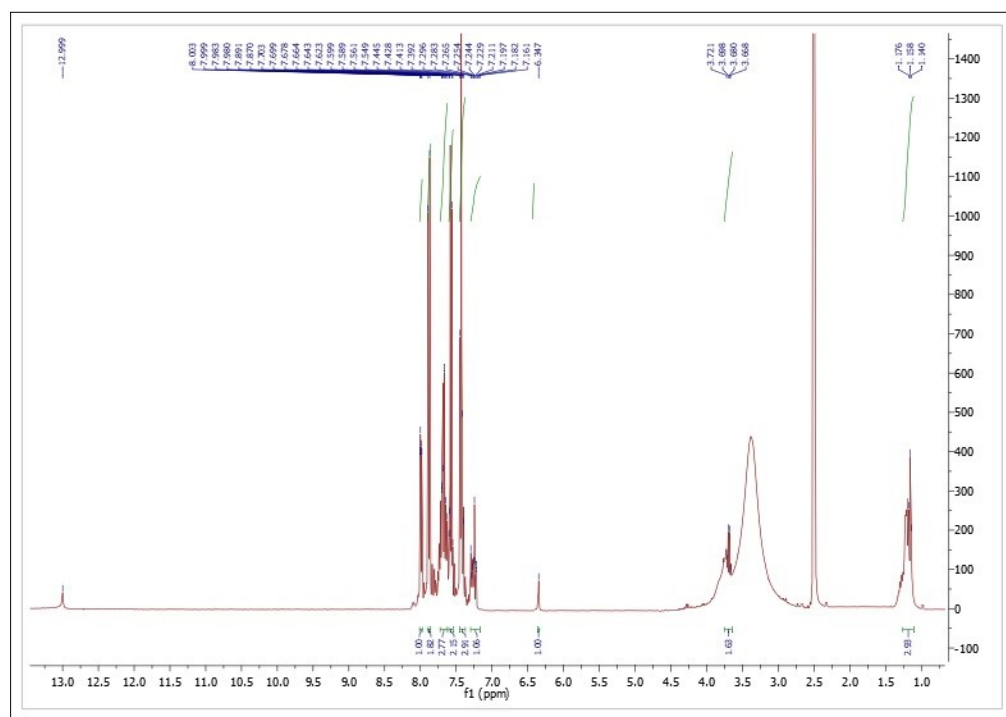

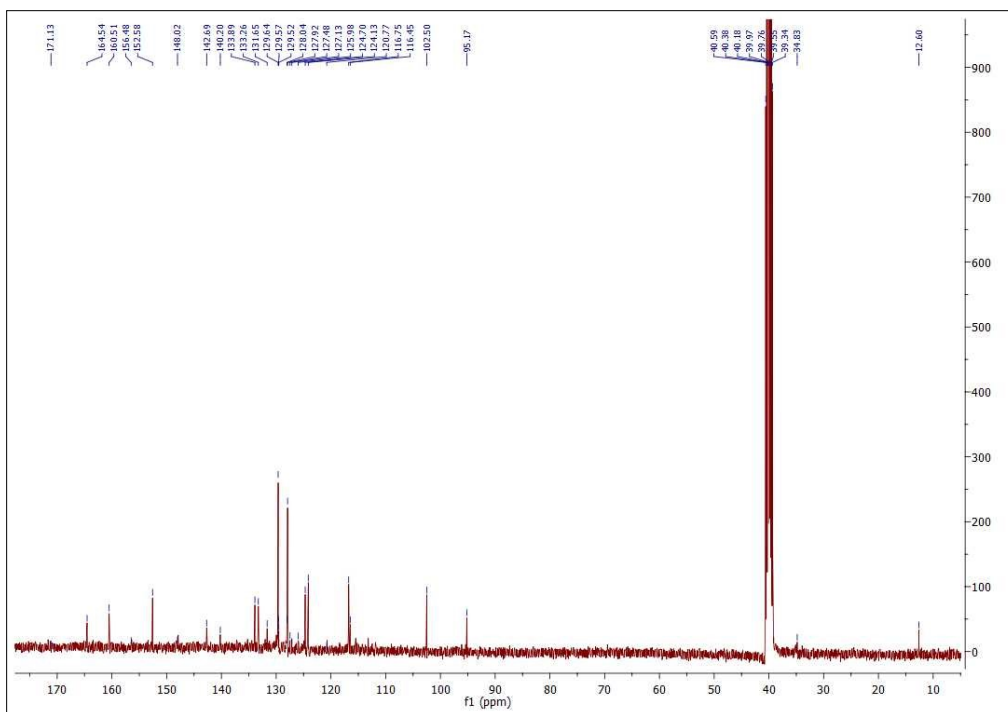

**<sup>13</sup>CNMR of compound 6h**

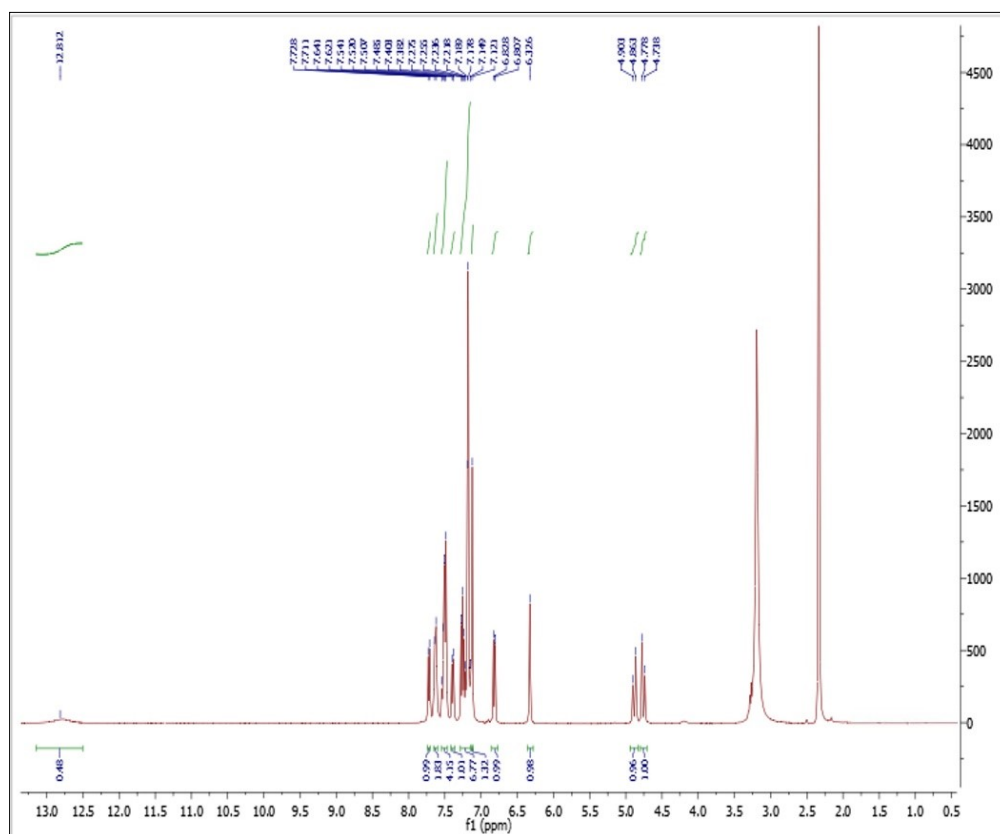

**<sup>1</sup>HNMR of compound 6i**

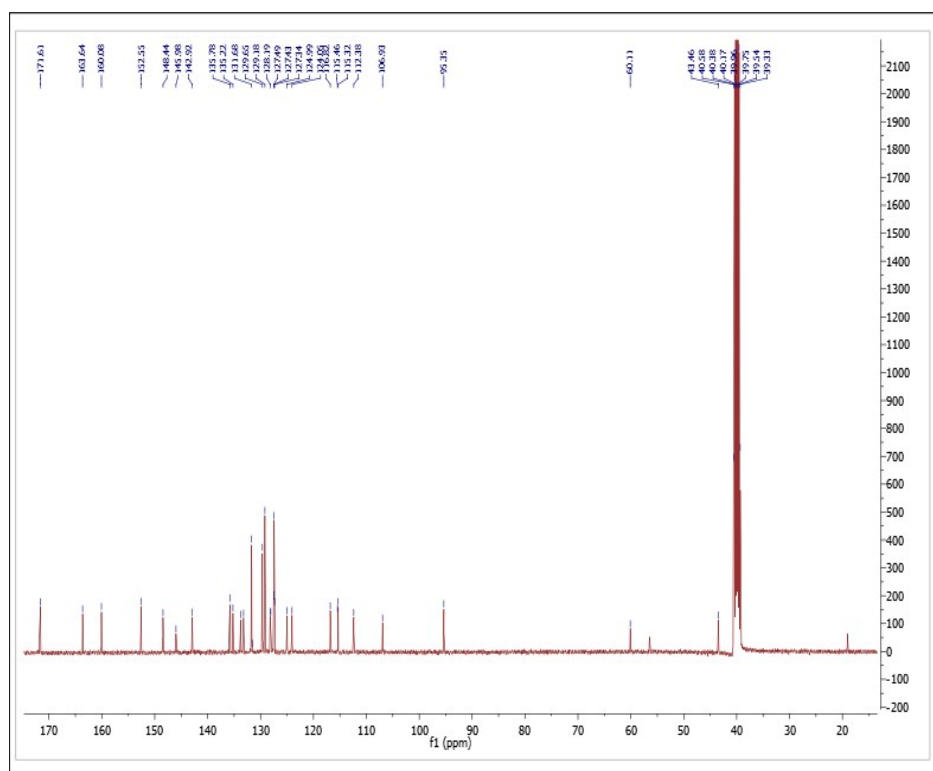

**<sup>13</sup>CNMR of compound 6i**

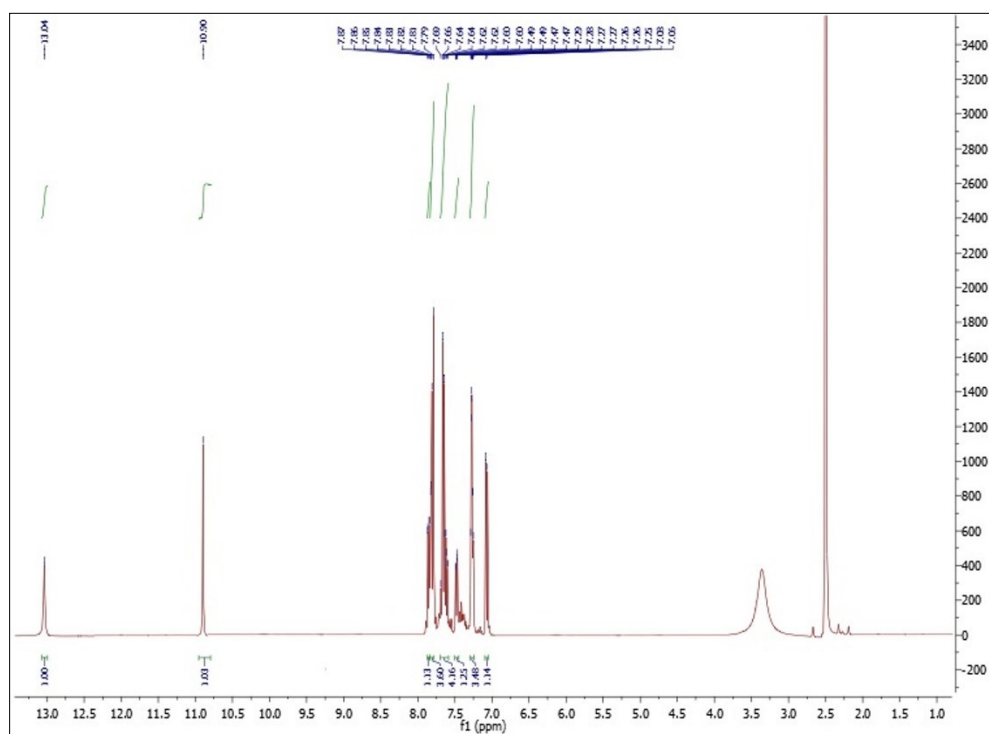

**<sup>1</sup>HNMR of compound 6j**

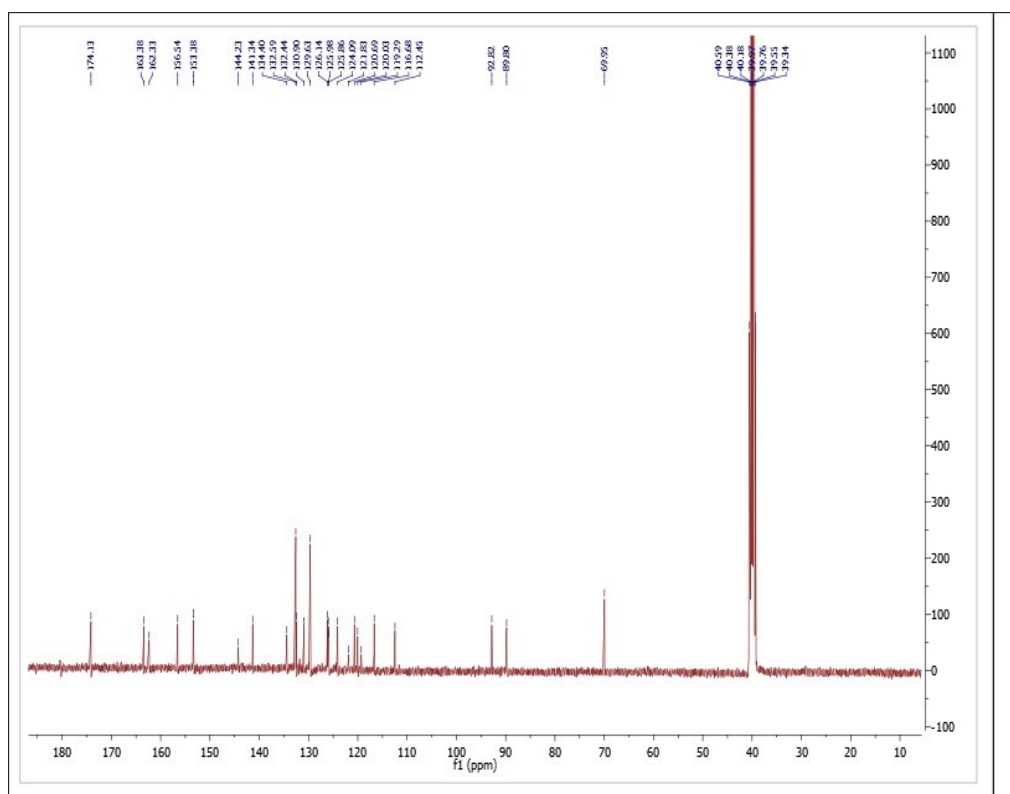

**<sup>13</sup>CNMR of compound 6j**

- **Molecular docking study against BRAF<sup>V600E</sup>**

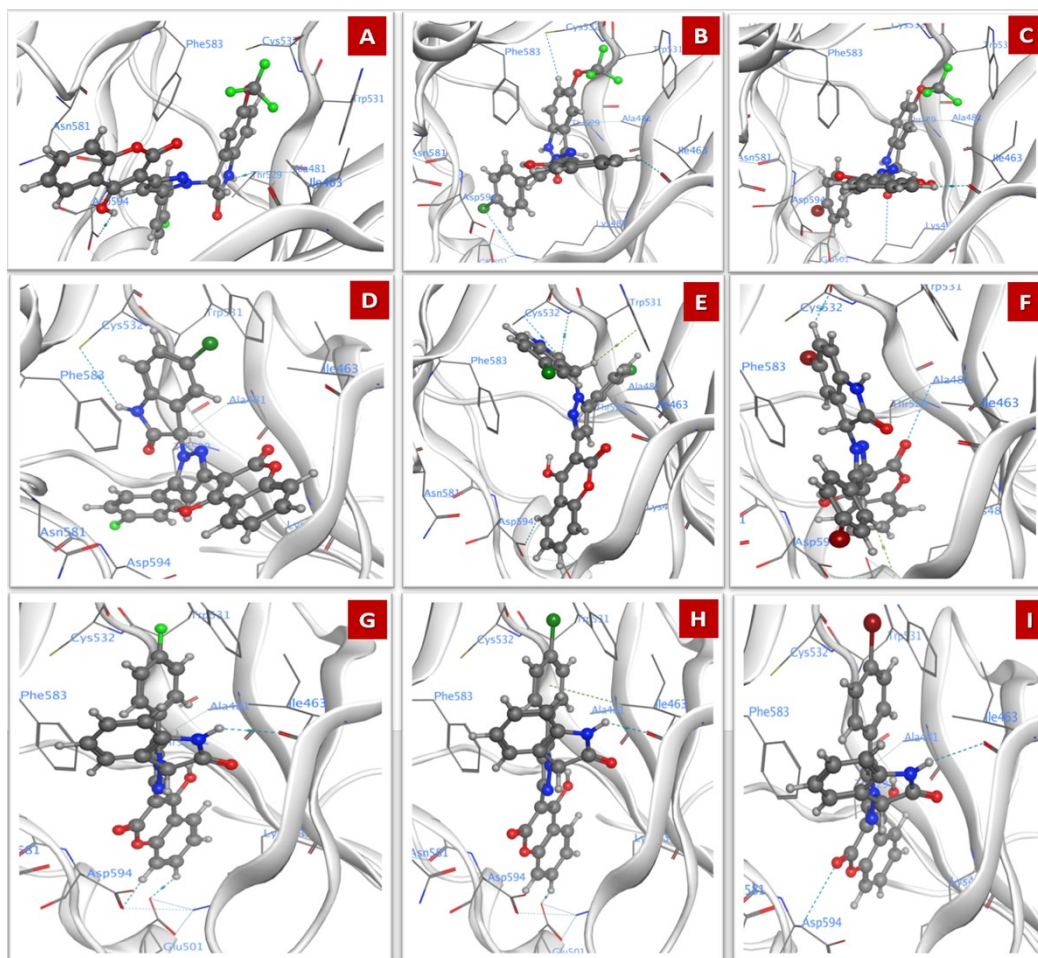

**Figure S1.** Docking of class I compounds with no substitution at N1-indoline (R1=H) against BRAF<sup>V600E</sup>:  
A) 4j, B) 5j, C) 6j, D) 4d, E) 5d, F) 6g, G) 4a, H) 5a, I) 6a.

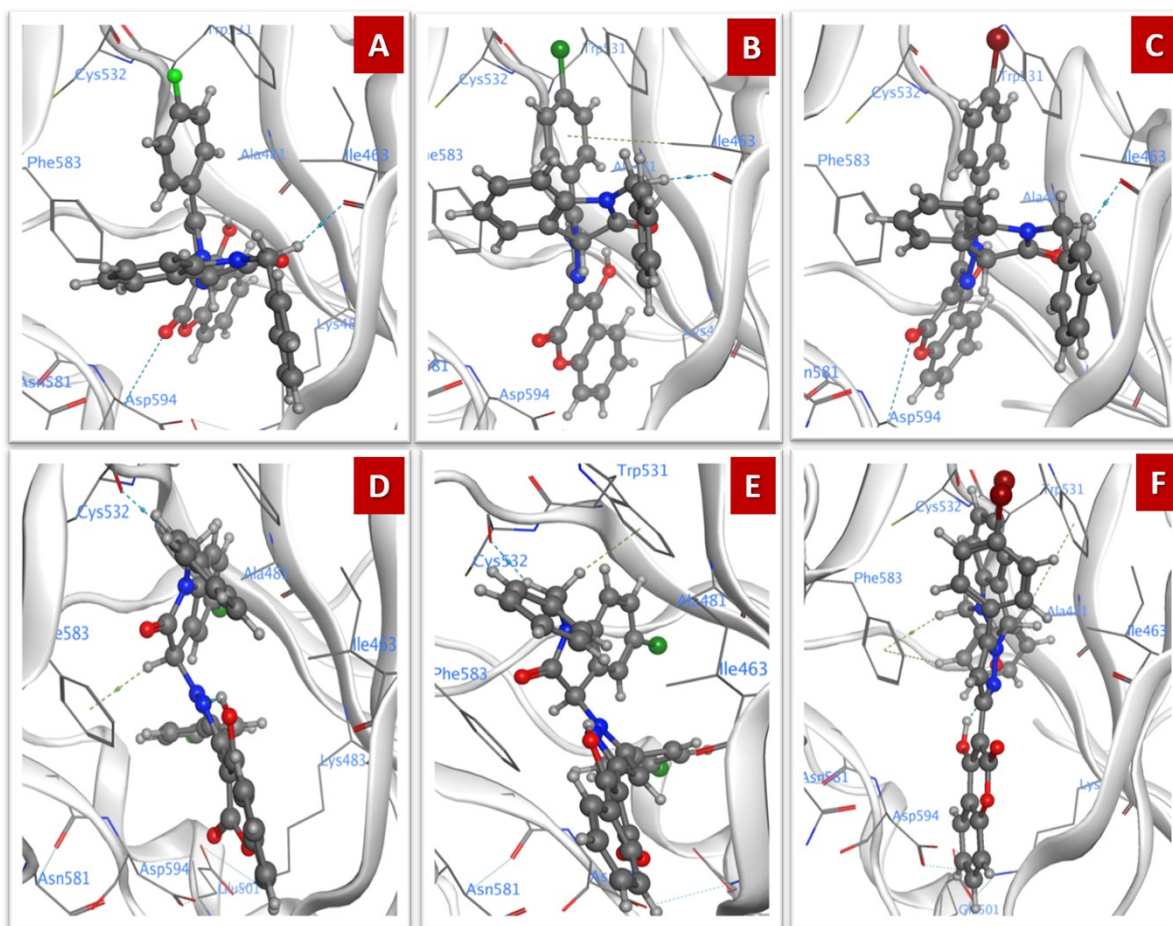

**Fig**

**ure S2.** Docking of Class II compounds with N-benzylindoline against BRAF<sup>V600E</sup>; A) 4c, B) 5c, C) 6c, D) 4f, E) 5f, F) 6i.

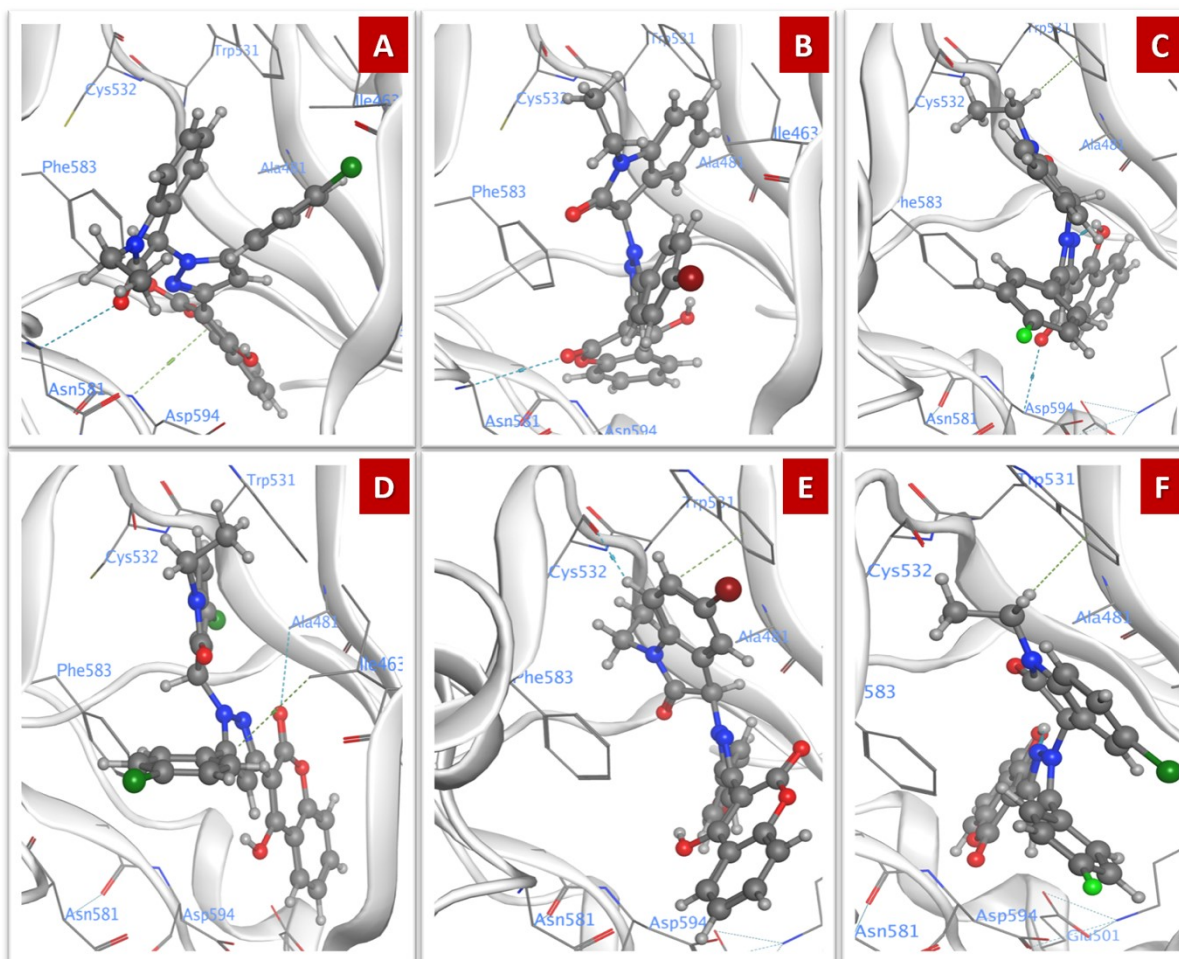

**Figure S3.** Docking of class III compounds with N-ethylindoline moiety against BRAF<sup>V600E</sup>, A) **5b**, B) **6b**, C) **4b**, D) **5e**, E) **6h**, F) **4e**

- Molecular docking study against VEGFR-2

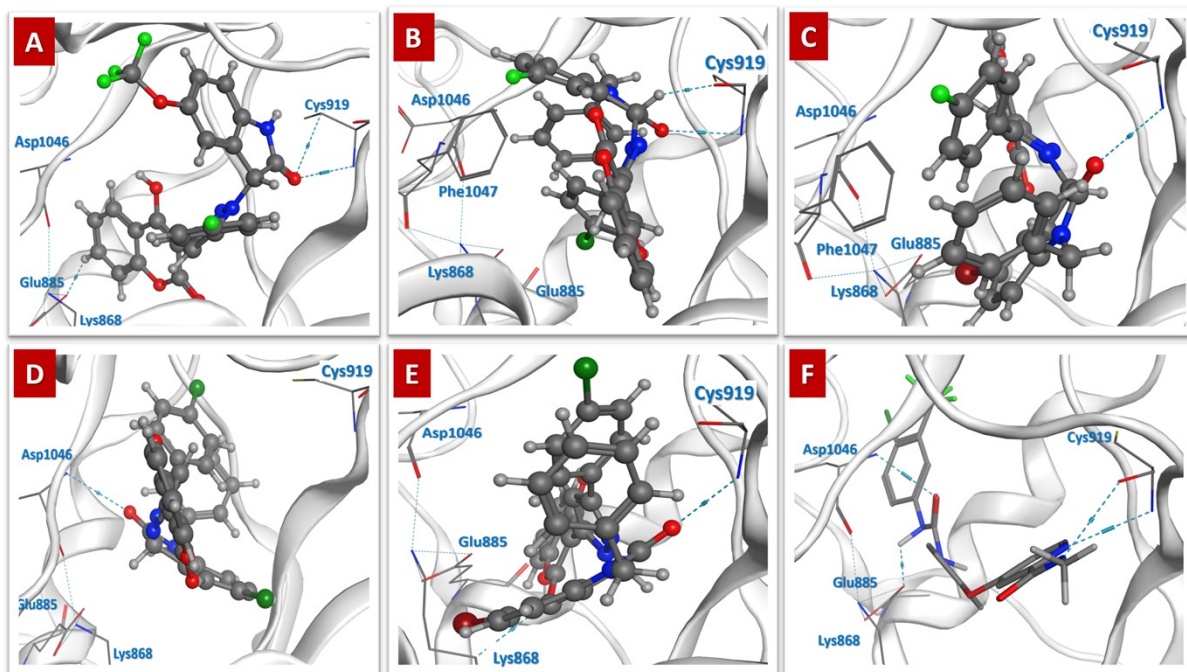

**Figure S4.** Best docking poses against VEGFR-2, A) Compound **4j**, B) Compound **4f**, C) Compound **4i**, D) Compound **5f**, E) Compound **5i**, F) Sorafenib.

- ADME Prediction Study

**Table S1: Predicted ADME properties for compounds 4j, 4f, 4i, 5f, and 5i**

| Property     | Model Name                             | Predicted value |          |          |          |          |
|--------------|----------------------------------------|-----------------|----------|----------|----------|----------|
|              |                                        | 4j              | 4f       | 4i       | 5f       | 5i       |
| Absorption   | Caco2 permeability (log cm/s)          | -5.01           | -5.11    | -5.11    | -5.11    | -5.09    |
|              | Intestinal absorption (% absorbed)     | 100%            | 97.102%  | 97.035%  | 96.118 % | 95.984%  |
|              | Skin Permeability (log Kp)             | -2.735          | -2.735   | -2.735   | -2.735   | -2.735   |
|              | P-glycoprotein substrate               | Yes             | Yes      | Yes      | Yes      | Yes      |
|              | P-glycoprotein I inhibitor             | Yes             | Yes      | Yes      | Yes      | Yes      |
|              | P-glycoprotein II inhibitor            | Yes             | Yes      | Yes      | Yes      | Yes      |
| Distribution | The volume of distribution (VD) (L/kg) | 0.435           | 0.284    | 0.342    | 0.214    | 0.341    |
|              | Plasma protein binding                 | 100%            | 101.39%  | 101.240% | 101.746% | 101.69%  |
|              | The fraction unbound in plasma         | 0.742%          | 0.783%   | 1.006 %  | 0.816%   | 0.988%   |
| Metabolism   | CYP2D6 substrate                       | No              | No       | No       | No       | No       |
|              | CYP3A4 substrate                       | Yes             | Yes      | Yes      | Yes      | Yes      |
|              | CYP1A2 inhibitor                       | No              | No       | No       | No       | No       |
|              | CYP2C19 inhibitor                      | No              | No       | No       | No       | No       |
|              | CYP2C9 inhibitor                       | Yes             | Yes      | Yes      | Yes      | Yes      |
|              | CYP2D6 inhibitor                       | No              | No       | No       | No       | No       |
|              | CYP3A4 inhibitor                       | No              | No       | No       | No       | No       |
| Excretion    | Total Clearance (ml/min/kg)            | 2.8             | 2.409    | 1.359    | 2.098    | 1.056    |
|              | Renal OCT2 substrate                   | No              | No       | No       | No       | No       |
|              | The half-life ( $T_{1/2}$ )            | 0.009 hr        | 0.002 hr | 0.002 hr | 0.002 hr | 0.002 hr |
| Toxicity     | AMES Toxicity                          | No              | No       | No       | No       | No       |
|              | Skin Sensitization                     | No              | No       | No       | No       | No       |
|              | Carcinogenicity                        | No              | No       | No       | No       | No       |
|              | Eye Corrosion / Irritation             | No              | No       | No       | No       | No       |
